# Supplementary material for: Amphiphilic interactions of ionic liquids with lipid biomembranes: a molecular simulation study
Source: Royal Society of Chemistry journal article supplement (doi:10.1039/c4sm01528b), 2014-09-02
Supplement: c4sm01528b1.pdf [file c4sm01528b1.pdf]

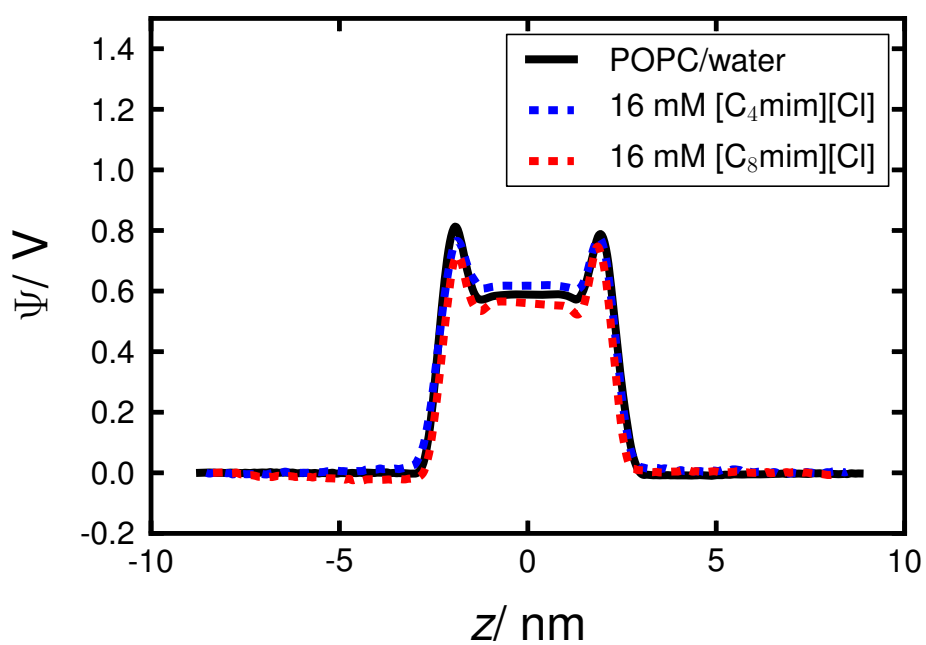

**Fig. S1** Mean square displacements for POPC in the XY direction for each system, partitioned every 20 ns during the 100 ns simulation.

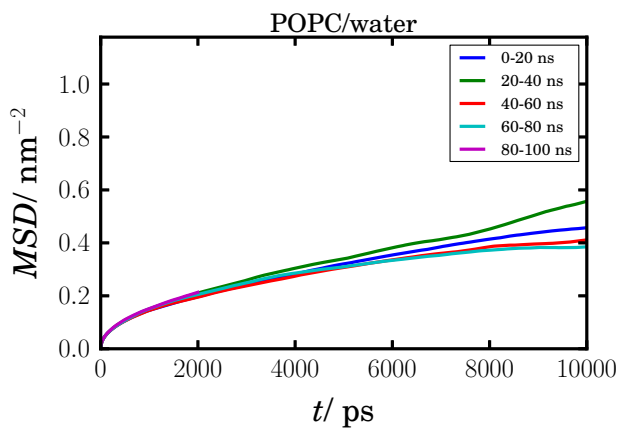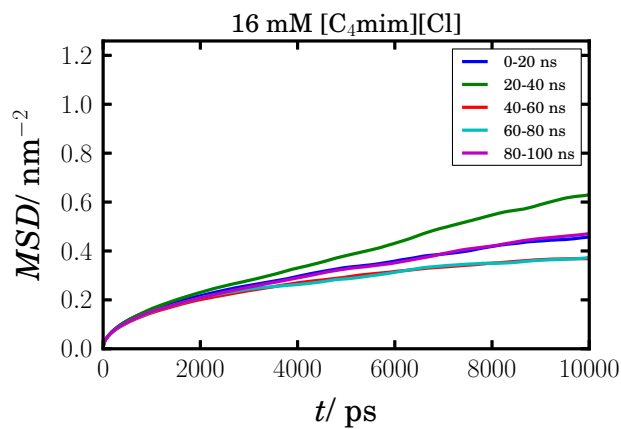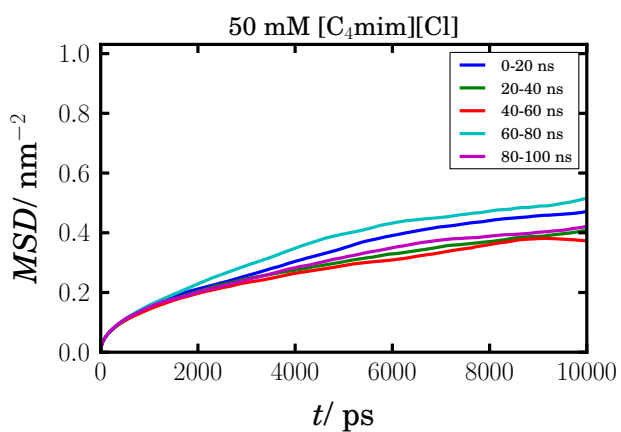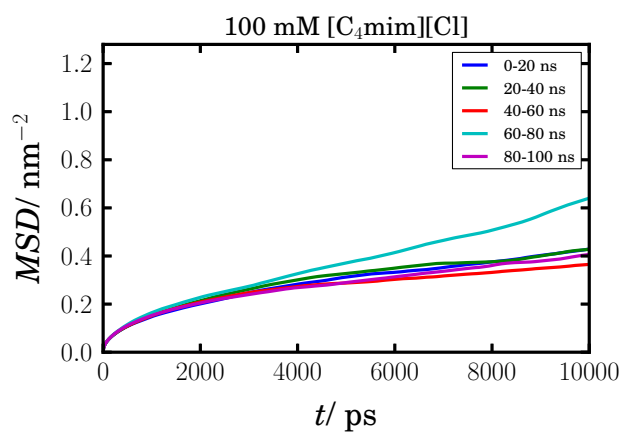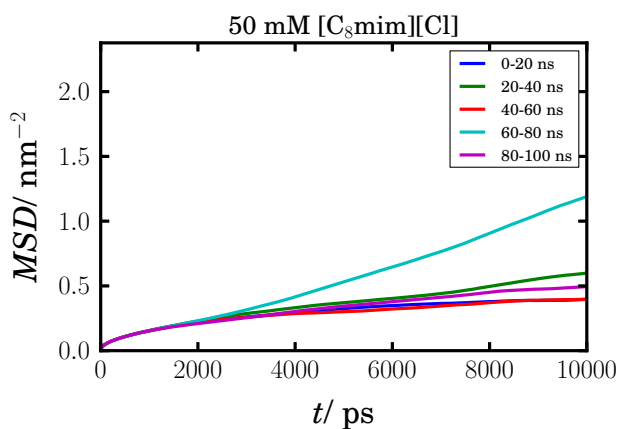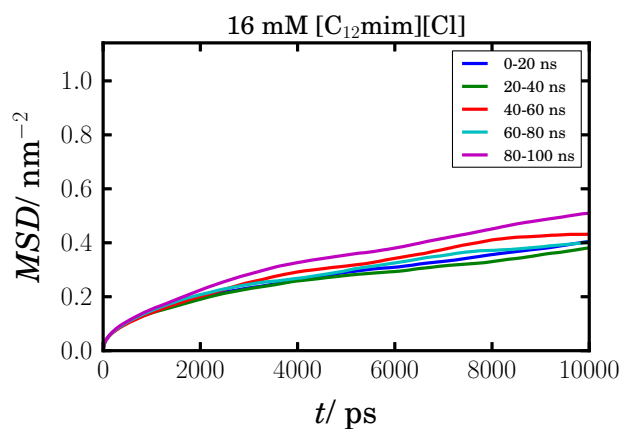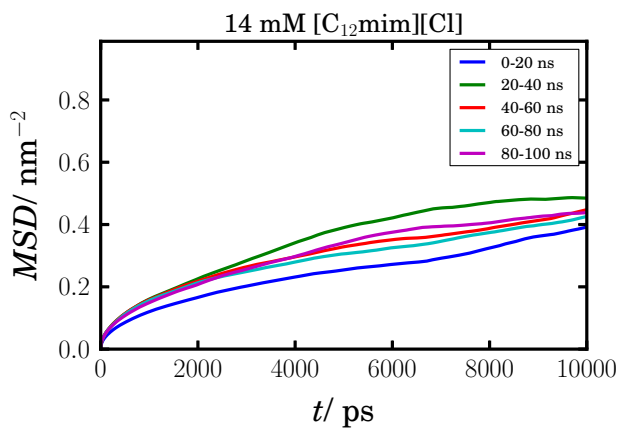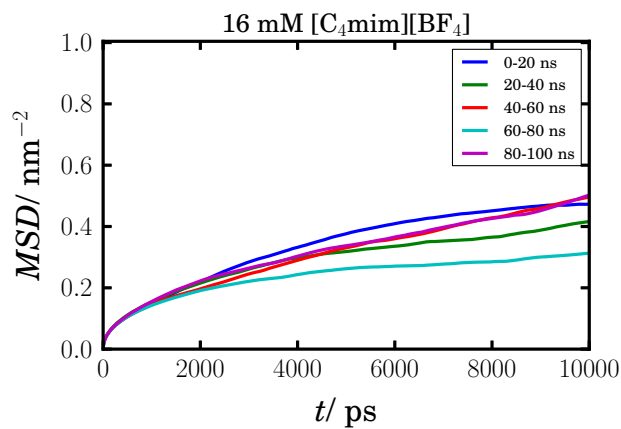

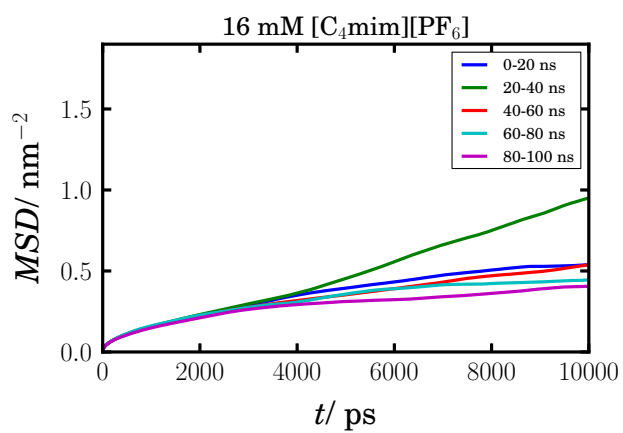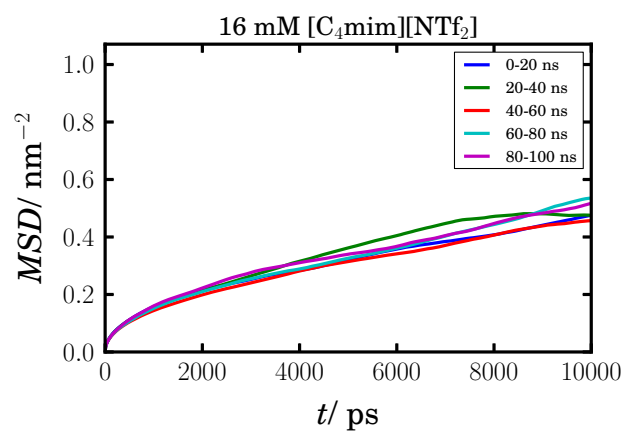

**Fig. S2** Mean square displacements for POPC in the XY direction for each system, partitioned every 20 ns during the 100 ns simulation.
