# Supplementary material for: Amphiphilic interactions of ionic liquids with lipid biomembranes: a molecular simulation study
Source: Royal Society of Chemistry journal article supplement (doi:10.1039/c4sm01528b), 2014-09-02
Supplement: c4sm01528b2.pdf [file c4sm01528b2.pdf]

### Force Field Files

#### Cations

c4mim.itp

```
[ moleculetype ]
; Name          nrexcl
BMI             3

[ atoms ]
;  nr      type  resnr  residue  atom  cgnr  charge  mass
   1       CR    1      BMI     Z1    1     0.0000  13.0190
   2       H5    1      BMI     Z2    2     0.1500   1.0079
   3       CW    1      BMI     Z3    3    -0.1600  13.0190
   4       H4    1      BMI     Z4    4     0.2000   1.0079
   5       CW    1      BMI     Z5    5    -0.1600  13.0190
   6       H4    1      BMI     Z6    6     0.2000   1.0079
   7       NA    1      BMI     Z7    7     0.0150  14.0067
   8       NA    1      BMI     Z8    8     0.0150  14.0067
   9      CN3    1      BMI     Z9    9     0.2600  15.0350
  10      CN2    1      BMI    Z10   10     0.2300  14.0270
  11      CTA    1      BMI    Z11   11     0.0500  14.0270
  12      CT2    1      BMI    Z12   12     0.0000  14.0270
  13      CT3    1      BMI    Z13   13     0.0000  15.0350

[ bonds ]
;  ai    aj  funct      r      k
   1     2    1     0.10700  2.8811e+05
   1     7    1     0.13250  3.4401e+05
   1     8    1     0.13250  3.4401e+05
   3     4    1     0.10700  2.8811e+05
   3     5    1     0.13430  4.0033e+05
   3     7    1     0.13780  3.4401e+05
   5     6    1     0.10700  2.8811e+05
   5     8    1     0.13780  3.4401e+05
   7     9    1     0.15000  2.1631e+05
   8    10    1     0.14920  2.1631e+05
  10    11    1     0.16100  1.6284e+05
  11    12    1     0.16100  1.6284e+05
  12    13    1     0.16100  2.1631e+05

[ pairs ]
;  ai    aj  funct
   1     4    1
   1     6    1
   1    11    1
   2     3    1
   2     9    1
   2     5    1
   2    10    1
   3    10    1
   4     6    1
```

|    |    |   |
|----|----|---|
| 4  | 8  | 1 |
| 4  | 9  | 1 |
| 5  | 9  | 1 |
| 5  | 11 | 1 |
| 6  | 7  | 1 |
| 6  | 10 | 1 |
| 7  | 10 | 1 |
| 8  | 9  | 1 |
| 8  | 12 | 1 |
| 10 | 13 | 1 |

[ angles ]

| ; | ai | aj | ak | funct | theta      | cth        |
|---|----|----|----|-------|------------|------------|
|   | 2  | 1  | 7  | 1     | 1.2570e+02 | 4.2844e+02 |
|   | 2  | 1  | 8  | 1     | 1.2570e+02 | 4.2844e+02 |
|   | 7  | 1  | 8  | 1     | 1.0990e+02 | 6.1672e+02 |
|   | 4  | 3  | 5  | 1     | 1.3070e+02 | 4.1840e+02 |
|   | 4  | 3  | 7  | 1     | 1.2210e+02 | 4.2844e+02 |
|   | 5  | 3  | 7  | 1     | 1.0710e+02 | 5.8409e+02 |
|   | 3  | 5  | 6  | 1     | 1.3070e+02 | 4.1840e+02 |
|   | 3  | 5  | 8  | 1     | 1.0710e+02 | 5.8409e+02 |
|   | 6  | 5  | 8  | 1     | 1.2210e+02 | 4.2844e+02 |
|   | 1  | 7  | 3  | 1     | 1.0800e+02 | 5.6735e+02 |
|   | 1  | 7  | 9  | 1     | 1.2630e+02 | 5.3723e+02 |
|   | 3  | 7  | 9  | 1     | 1.2570e+02 | 5.3723e+02 |
|   | 1  | 8  | 5  | 1     | 1.0800e+02 | 5.6735e+02 |
|   | 1  | 8  | 10 | 1     | 1.2630e+02 | 5.3723e+02 |
|   | 5  | 8  | 10 | 1     | 1.2570e+02 | 5.3723e+02 |
|   | 8  | 10 | 11 | 1     | 1.1220e+02 | 6.6944e+02 |
|   | 10 | 11 | 12 | 1     | 1.0220e+02 | 7.8324e+02 |
|   | 11 | 12 | 13 | 1     | 1.0480e+02 | 9.5060e+02 |

[ dihedrals ]

| ; | ai | aj | ak | al | funct | theta | cth     | mult |
|---|----|----|----|----|-------|-------|---------|------|
|   | 1  | 7  | 3  | 4  | 1     | 180.0 | 8.3680  | 2;   |
|   | 1  | 7  | 3  | 5  | 1     | 180.0 | 50.2080 | 2;   |
|   | 1  | 8  | 5  | 3  | 1     | 180.0 | 50.2080 | 2;   |
|   | 1  | 8  | 5  | 6  | 1     | 180.0 | 8.3680  | 2;   |
|   | 1  | 8  | 10 | 11 | 9     | 0.0   | 0.0711  | 1;   |
|   | 1  | 8  | 10 | 11 | 9     | 180.0 | 0.0628  | 2;   |
|   | 1  | 8  | 10 | 11 | 9     | 0.0   | -0.8870 | 3;   |
|   | 2  | 1  | 7  | 3  | 1     | 180.0 | 6.2760  | 2;   |
|   | 2  | 1  | 7  | 9  | 1     | 180.0 | 6.2760  | 2;   |
|   | 2  | 1  | 8  | 5  | 1     | 180.0 | 6.2760  | 2;   |
|   | 2  | 1  | 8  | 10 | 1     | 180.0 | 6.2760  | 2;   |
|   | 3  | 5  | 8  | 10 | 1     | 180.0 | 8.3680  | 2;   |
|   | 3  | 7  | 1  | 8  | 1     | 180.0 | 50.2080 | 2;   |
|   | 4  | 3  | 5  | 6  | 1     | 180.0 | 6.2760  | 2;   |
|   | 4  | 3  | 5  | 8  | 1     | 180.0 | 6.2760  | 2;   |
|   | 4  | 3  | 7  | 9  | 1     | 180.0 | 6.2760  | 2;   |
|   | 5  | 3  | 7  | 9  | 1     | 180.0 | 8.3680  | 2;   |
|   | 5  | 8  | 1  | 7  | 1     | 180.0 | 50.2080 | 2;   |

|    |    |    |    |   |       |          |    |
|----|----|----|----|---|-------|----------|----|
| 5  | 8  | 10 | 11 | 9 | 0.0   | 0.8075   | 1; |
| 5  | 8  | 10 | 11 | 9 | 180.0 | 0.9205   | 2; |
| 5  | 8  | 10 | 11 | 9 | 0.0   | 0.0377   | 3; |
| 6  | 5  | 3  | 7  | 1 | 180.0 | 6.2760   | 2; |
| 6  | 5  | 8  | 10 | 1 | 180.0 | 6.2760   | 2; |
| 7  | 1  | 8  | 10 | 1 | 180.0 | 8.3680   | 2; |
| 7  | 3  | 5  | 8  | 1 | 180.0 | 50.2080  | 2; |
| 8  | 1  | 7  | 9  | 1 | 180.0 | 8.3680   | 2; |
| 10 | 11 | 12 | 13 | 9 | 0.0   | -14.6440 | 1; |
| 10 | 11 | 12 | 13 | 9 | 180.0 | 6.6944   | 2; |
| 10 | 11 | 12 | 13 | 9 | 0.0   | 6.6944   | 3; |
| 1  | 3  | 7  | 9  | 4 | 180.0 | 8.3680   | 2; |
| 1  | 5  | 8  | 10 | 4 | 180.0 | 8.3680   | 2; |
| 7  | 5  | 3  | 4  | 4 | 180.0 | 4.6024   | 2; |
| 7  | 8  | 1  | 2  | 4 | 180.0 | 4.6024   | 2; |
| 8  | 3  | 5  | 6  | 4 | 180.0 | 4.6024   | 2; |

### c8mim.itp

```
[ moleculetype ]
; Name          nrexcl
OMI             3

[ atoms ]
;  nr      type  resnr  residue  atom  cgnr    charge    mass
  1         CR    1      OMI     C1    1      0.0000    13.0190
  2         H5    1      OMI     H2    2      0.1500     1.0079
  3         CW    1      OMI     C3    3     -0.1600    13.0190
  4         H4    1      OMI     H4    4      0.2000     1.0079
  5         CW    1      OMI     C5    5     -0.1600    13.0190
  6         H4    1      OMI     H6    6      0.2000     1.0079
  7         NA    1      OMI     N7    7      0.0150    14.0067
  8         NA    1      OMI     N8    8      0.0150    14.0067
  9         CN3   1      OMI     C9    9      0.2600    15.0350
 10         CN2   1      OMI     C10   10     0.2300    14.0270
 11         CTA   1      OMI     C11   11     0.0500    14.0270
 12         CT2   1      OMI     C12   12     0.0000    14.0270
 13         CT2   1      OMI     C13   13     0.0000    14.0270
 14         CT2   1      OMI     C14   14     0.0000    14.0270
 15         CT2   1      OMI     C15   15     0.0000    14.0270
 16         CT2   1      OMI     C16   16     0.0000    14.0270
 17         CT3   1      OMI     C17   17     0.0000    15.0350

[ bonds ]
;  ai    aj  funct      r      k
  1     2    1      0.10700  2.8811e+05
  1     7    1      0.13250  3.4401e+05
  1     8    1      0.13250  3.4401e+05
  3     4    1      0.10700  2.8811e+05
  3     5    1      0.13430  4.0033e+05
```

|    |    |   |         |            |
|----|----|---|---------|------------|
| 3  | 8  | 1 | 0.13780 | 3.4401e+05 |
| 5  | 6  | 1 | 0.10700 | 2.8811e+05 |
| 5  | 7  | 1 | 0.13780 | 3.4401e+05 |
| 7  | 10 | 1 | 0.14920 | 2.1631e+05 |
| 8  | 9  | 1 | 0.15000 | 2.1631e+05 |
| 10 | 11 | 1 | 0.16100 | 1.6284e+05 |
| 11 | 12 | 1 | 0.16100 | 1.6284e+05 |
| 12 | 13 | 1 | 0.16100 | 1.6284e+05 |
| 13 | 14 | 1 | 0.16100 | 1.6284e+05 |
| 14 | 15 | 1 | 0.16100 | 1.6284e+05 |
| 15 | 16 | 1 | 0.16100 | 1.6284e+05 |
| 16 | 17 | 1 | 0.16100 | 2.1840e+05 |

[ pairs ]

| ; ai | aj | funct |
|------|----|-------|
| 1    | 6  | 1     |
| 1    | 11 | 1     |
| 1    | 4  | 1     |
| 2    | 5  | 1     |
| 2    | 10 | 1     |
| 2    | 3  | 1     |
| 2    | 9  | 1     |
| 3    | 10 | 1     |
| 4    | 6  | 1     |
| 4    | 7  | 1     |
| 4    | 9  | 1     |
| 5    | 9  | 1     |
| 5    | 11 | 1     |
| 6    | 8  | 1     |
| 6    | 10 | 1     |
| 7    | 9  | 1     |
| 7    | 12 | 1     |
| 8    | 10 | 1     |
| 10   | 13 | 1     |
| 11   | 14 | 1     |
| 12   | 15 | 1     |
| 13   | 16 | 1     |
| 14   | 17 | 1     |

[ angles ]

| ; ai | aj | ak | funct | theta      | cth        |
|------|----|----|-------|------------|------------|
| 2    | 1  | 7  | 1     | 1.2570e+02 | 4.2844e+02 |
| 2    | 1  | 8  | 1     | 1.2570e+02 | 4.2844e+02 |
| 7    | 1  | 8  | 1     | 1.0990e+02 | 6.1672e+02 |
| 4    | 3  | 5  | 1     | 1.3070e+02 | 4.1840e+02 |
| 4    | 3  | 8  | 1     | 1.2210e+02 | 4.2844e+02 |
| 5    | 3  | 8  | 1     | 1.0710e+02 | 5.8409e+02 |
| 3    | 5  | 6  | 1     | 1.3070e+02 | 4.1840e+02 |
| 3    | 5  | 7  | 1     | 1.0710e+02 | 5.8409e+02 |
| 6    | 5  | 7  | 1     | 1.2210e+02 | 4.2844e+02 |
| 1    | 7  | 5  | 1     | 1.0800e+02 | 5.6735e+02 |
| 1    | 7  | 10 | 1     | 1.2630e+02 | 5.3723e+02 |

|    |    |    |   |            |            |
|----|----|----|---|------------|------------|
| 5  | 7  | 10 | 1 | 1.2570e+02 | 5.3723e+02 |
| 1  | 8  | 3  | 1 | 1.0800e+02 | 5.6735e+02 |
| 1  | 8  | 9  | 1 | 1.2630e+02 | 5.3723e+02 |
| 3  | 8  | 9  | 1 | 1.2570e+02 | 5.3723e+02 |
| 7  | 10 | 11 | 1 | 1.1220e+02 | 6.6944e+02 |
| 10 | 11 | 12 | 1 | 1.0220e+02 | 7.8324e+02 |
| 11 | 12 | 13 | 1 | 1.0220e+02 | 7.8324e+02 |
| 12 | 13 | 14 | 1 | 1.0220e+02 | 7.8324e+02 |
| 13 | 14 | 15 | 1 | 1.0220e+02 | 7.8324e+02 |
| 14 | 15 | 16 | 1 | 1.0220e+02 | 7.8324e+02 |
| 15 | 16 | 17 | 1 | 1.0480e+02 | 9.5060e+02 |

[ dihedrals ]

| ; | ai | aj | ak | al | funct | theta | cth      | mult |
|---|----|----|----|----|-------|-------|----------|------|
|   | 1  | 7  | 5  | 3  | 1     | 180.0 | 50.2080  | 2;   |
|   | 1  | 7  | 5  | 6  | 1     | 180.0 | 8.3680   | 2;   |
|   | 1  | 7  | 10 | 11 | 9     | 0.0   | 0.0711   | 1;   |
|   | 1  | 7  | 10 | 11 | 9     | 180.0 | 0.06276  | 2;   |
|   | 1  | 7  | 10 | 11 | 9     | 0.0   | 0.8870   | 3;   |
|   | 1  | 8  | 3  | 4  | 1     | 180.0 | 8.3680   | 2;   |
|   | 1  | 8  | 3  | 5  | 1     | 180.0 | 50.2080  | 2;   |
|   | 2  | 1  | 7  | 5  | 1     | 180.0 | 6.2760   | 2;   |
|   | 2  | 1  | 7  | 10 | 1     | 180.0 | 6.2760   | 2;   |
|   | 2  | 1  | 8  | 3  | 1     | 180.0 | 6.2760   | 2;   |
|   | 2  | 1  | 8  | 9  | 1     | 180.0 | 6.2760   | 2;   |
|   | 3  | 5  | 7  | 10 | 1     | 180.0 | 8.3680   | 2;   |
|   | 3  | 8  | 1  | 7  | 1     | 180.0 | 50.2080  | 2;   |
|   | 4  | 3  | 5  | 6  | 1     | 180.0 | 6.2760   | 2;   |
|   | 4  | 3  | 5  | 7  | 1     | 180.0 | 6.2760   | 2;   |
|   | 4  | 3  | 8  | 9  | 1     | 180.0 | 6.2760   | 2;   |
|   | 5  | 3  | 8  | 9  | 1     | 180.0 | 8.3680   | 2;   |
|   | 5  | 7  | 1  | 8  | 1     | 180.0 | 50.2080  | 2;   |
|   | 5  | 7  | 10 | 11 | 9     | 0.0   | 0.8075   | 1;   |
|   | 5  | 7  | 10 | 11 | 9     | 180.0 | 0.9205   | 2;   |
|   | 5  | 7  | 10 | 11 | 9     | 0.0   | 0.03766  | 3;   |
|   | 6  | 5  | 3  | 8  | 1     | 180.0 | 6.2760   | 2;   |
|   | 6  | 5  | 7  | 10 | 1     | 180.0 | 6.2760   | 2;   |
|   | 7  | 1  | 8  | 9  | 1     | 180.0 | 8.3680   | 2;   |
|   | 7  | 5  | 3  | 8  | 1     | 180.0 | 50.2080  | 2;   |
| ; | 7  | 10 | 11 | 12 | 1     | 0.0   | 0.0000   | 0;   |
|   | 8  | 1  | 7  | 10 | 1     | 180.0 | 8.3680   | 2;   |
|   | 10 | 11 | 12 | 13 | 9     | 0.0   | -14.6440 | 1;   |
|   | 10 | 11 | 12 | 13 | 9     | 180.0 | 6.6944   | 2;   |
|   | 10 | 11 | 12 | 13 | 9     | 0.0   | 6.6944   | 3;   |
|   | 11 | 12 | 13 | 14 | 9     | 0.0   | -14.6440 | 1;   |
|   | 11 | 12 | 13 | 14 | 9     | 180.0 | 6.6944   | 2;   |
|   | 11 | 12 | 13 | 14 | 9     | 0.0   | 6.6944   | 3;   |
|   | 12 | 13 | 14 | 15 | 9     | 0.0   | -14.6440 | 1;   |
|   | 12 | 13 | 14 | 15 | 9     | 180.0 | 6.6944   | 2;   |
|   | 12 | 13 | 14 | 15 | 9     | 0.0   | 6.6944   | 3;   |
|   | 13 | 14 | 15 | 16 | 9     | 0.0   | -14.6440 | 1;   |
|   | 13 | 14 | 15 | 16 | 9     | 180.0 | 6.6944   | 2;   |

|    |    |    |    |   |       |          |    |
|----|----|----|----|---|-------|----------|----|
| 13 | 14 | 15 | 16 | 9 | 0.0   | 6.6944   | 3; |
| 14 | 15 | 16 | 17 | 9 | 0.0   | -14.6440 | 1; |
| 14 | 15 | 16 | 17 | 9 | 180.0 | 6.6944   | 2; |
| 14 | 15 | 16 | 17 | 9 | 0.0   | 6.6944   | 3; |
| 1  | 3  | 8  | 9  | 4 | 180.0 | 8.3680   | 2; |
| 1  | 5  | 7  | 10 | 4 | 180.0 | 8.3680   | 2; |
| 7  | 5  | 3  | 6  | 4 | 180.0 | 4.6024   | 2; |
| 7  | 8  | 1  | 2  | 4 | 180.0 | 4.6024   | 2; |
| 8  | 3  | 5  | 4  | 4 | 180.0 | 4.6024   | 2; |

c12mim.itp

```
[ moleculetype ]
; Name          nrexcl
DMI             3

[ atoms ]
;  nr          type  resnr  residue  atom  cgnr      charge      mass
  1             CR    1     DMI     Z1    1       0.0000     13.0190
  2             H5    1     DMI     Z2    2       0.1500      1.0079
  3             CW    1     DMI     Z3    3      -0.1600     13.0190
  4             H4    1     DMI     Z4    4       0.2000      1.0079
  5             CW    1     DMI     Z5    5      -0.1600     13.0190
  6             H4    1     DMI     Z6    6       0.2000      1.0079
  7             NA    1     DMI     Z7    7       0.0150     14.0067
  8             NA    1     DMI     Z8    8       0.0150     14.0067
  9            CN3    1     DMI     Z9    9       0.2600     15.0350
 10            CN2    1     DMI    Z10   10      0.2300     14.0270
 11            CTA    1     DMI    Z11   11      0.0500     14.0270
 12            CT2    1     DMI    Z12   12      0.0000     14.0270
 13            CT2    1     DMI    Z13   13      0.0000     14.0270
 14            CT2    1     DMI    Z14   14      0.0000     14.0270
 15            CT2    1     DMI    Z15   15      0.0000     14.0270
 16            CT2    1     DMI    Z16   16      0.0000     14.0270
 17            CT2    1     DMI    Z17   17      0.0000     14.0270
 18            CT2    1     DMI    Z18   18      0.0000     14.0270
 19            CT2    1     DMI    Z19   19      0.0000     14.0270
 20            CT2    1     DMI    Z20   20      0.0000     14.0270
 21            CT3    1     DMI    Z21   21      0.0000     15.0350

[ bonds ]
;  ai    aj  funct      r      k
  1     2    1      0.10700  2.8811e+05
  1     7    1      0.13250  3.4401e+05
  1     8    1      0.13250  3.4401e+05
  3     4    1      0.10700  2.8811e+05
  3     5    1      0.13430  4.0033e+05
  3     8    1      0.13780  3.4401e+05
  5     6    1      0.10700  2.8811e+05
  5     7    1      0.13780  3.4401e+05
  7    10    1      0.14920  2.1631e+05
  8     9    1      0.15000  2.1631e+05
```

|    |    |   |         |            |
|----|----|---|---------|------------|
| 10 | 11 | 1 | 0.16100 | 1.6284e+05 |
| 11 | 12 | 1 | 0.16100 | 1.6284e+05 |
| 12 | 13 | 1 | 0.16100 | 1.6284e+05 |
| 13 | 14 | 1 | 0.16100 | 1.6284e+05 |
| 14 | 15 | 1 | 0.16100 | 1.6284e+05 |
| 15 | 16 | 1 | 0.16100 | 1.6284e+05 |
| 16 | 17 | 1 | 0.16100 | 1.6284e+05 |
| 17 | 18 | 1 | 0.16100 | 1.6284e+05 |
| 18 | 19 | 1 | 0.16100 | 1.6284e+05 |
| 19 | 20 | 1 | 0.16100 | 1.6284e+05 |
| 20 | 21 | 1 | 0.16100 | 2.1840e+05 |

[ pairs ]

| ; ai | aj | funct |
|------|----|-------|
| 1    | 6  | 1     |
| 1    | 11 | 1     |
| 1    | 4  | 1     |
| 2    | 5  | 1     |
| 2    | 10 | 1     |
| 2    | 3  | 1     |
| 2    | 9  | 1     |
| 3    | 10 | 1     |
| 4    | 6  | 1     |
| 4    | 7  | 1     |
| 4    | 9  | 1     |
| 5    | 9  | 1     |
| 5    | 11 | 1     |
| 6    | 8  | 1     |
| 6    | 10 | 1     |
| 7    | 9  | 1     |
| 7    | 12 | 1     |
| 8    | 10 | 1     |
| 10   | 13 | 1     |
| 11   | 14 | 1     |
| 12   | 15 | 1     |
| 13   | 16 | 1     |
| 14   | 17 | 1     |
| 15   | 18 | 1     |
| 16   | 19 | 1     |
| 17   | 20 | 1     |
| 18   | 21 | 1     |

[ angles ]

| ; ai | aj | ak | funct | theta      | cth        |
|------|----|----|-------|------------|------------|
| 2    | 1  | 7  | 1     | 1.2570e+02 | 4.2844e+02 |
| 2    | 1  | 8  | 1     | 1.2570e+02 | 4.2844e+02 |
| 7    | 1  | 8  | 1     | 1.0990e+02 | 6.1672e+02 |
| 4    | 3  | 5  | 1     | 1.3070e+02 | 4.1840e+02 |
| 4    | 3  | 8  | 1     | 1.2210e+02 | 4.2844e+02 |
| 5    | 3  | 8  | 1     | 1.0710e+02 | 5.8409e+02 |
| 3    | 5  | 6  | 1     | 1.3070e+02 | 4.1840e+02 |
| 3    | 5  | 7  | 1     | 1.0710e+02 | 5.8409e+02 |

|    |    |    |   |            |            |
|----|----|----|---|------------|------------|
| 6  | 5  | 7  | 1 | 1.2210e+02 | 4.2844e+02 |
| 1  | 7  | 5  | 1 | 1.0800e+02 | 5.6735e+02 |
| 1  | 7  | 10 | 1 | 1.2630e+02 | 5.3723e+02 |
| 5  | 7  | 10 | 1 | 1.2570e+02 | 5.3723e+02 |
| 1  | 8  | 3  | 1 | 1.0800e+02 | 5.6735e+02 |
| 1  | 8  | 9  | 1 | 1.2630e+02 | 5.3723e+02 |
| 3  | 8  | 9  | 1 | 1.2570e+02 | 5.3723e+02 |
| 7  | 10 | 11 | 1 | 1.1220e+02 | 6.6944e+02 |
| 10 | 11 | 12 | 1 | 1.0220e+02 | 7.8324e+02 |
| 11 | 12 | 13 | 1 | 1.0220e+02 | 7.8324e+02 |
| 12 | 13 | 14 | 1 | 1.0220e+02 | 7.8324e+02 |
| 13 | 14 | 15 | 1 | 1.0220e+02 | 7.8324e+02 |
| 14 | 15 | 16 | 1 | 1.0220e+02 | 7.8324e+02 |
| 15 | 16 | 17 | 1 | 1.0220e+02 | 7.8324e+02 |
| 16 | 17 | 18 | 1 | 1.0220e+02 | 7.8324e+02 |
| 17 | 18 | 19 | 1 | 1.0220e+02 | 7.8324e+02 |
| 18 | 19 | 20 | 1 | 1.0220e+02 | 7.8324e+02 |
| 19 | 20 | 21 | 1 | 1.0480e+02 | 9.5060e+02 |

[ dihedrals ]

| ; | ai | aj | ak | al | funct | theta | cth      | mult |
|---|----|----|----|----|-------|-------|----------|------|
|   | 1  | 7  | 5  | 3  | 1     | 180.0 | 50.2080  | 2;   |
|   | 1  | 7  | 5  | 6  | 1     | 180.0 | 8.3680   | 2;   |
|   | 1  | 7  | 10 | 11 | 9     | 0.0   | 0.0711   | 1;   |
|   | 1  | 7  | 10 | 11 | 9     | 180.0 | 0.06276  | 2;   |
|   | 1  | 7  | 10 | 11 | 9     | 0.0   | -0.8870  | 3;   |
|   | 1  | 8  | 3  | 4  | 1     | 180.0 | 8.3680   | 2;   |
|   | 1  | 8  | 3  | 5  | 1     | 180.0 | 50.2080  | 2;   |
|   | 2  | 1  | 7  | 5  | 1     | 180.0 | 6.2760   | 2;   |
|   | 2  | 1  | 7  | 10 | 1     | 180.0 | 6.2760   | 2;   |
|   | 2  | 1  | 8  | 3  | 1     | 180.0 | 6.2760   | 2;   |
|   | 2  | 1  | 8  | 9  | 1     | 180.0 | 6.2760   | 2;   |
|   | 3  | 5  | 7  | 10 | 1     | 180.0 | 8.3680   | 2;   |
|   | 3  | 8  | 1  | 7  | 1     | 180.0 | 50.2080  | 2;   |
|   | 4  | 3  | 5  | 6  | 1     | 180.0 | 6.2760   | 2;   |
|   | 4  | 3  | 5  | 7  | 1     | 180.0 | 6.2760   | 2;   |
|   | 4  | 3  | 8  | 9  | 1     | 180.0 | 6.2760   | 2;   |
|   | 5  | 3  | 8  | 9  | 1     | 180.0 | 8.3680   | 2;   |
|   | 5  | 7  | 1  | 8  | 1     | 180.0 | 50.2080  | 2;   |
|   | 5  | 7  | 10 | 11 | 9     | 0.0   | 0.8075   | 1;   |
|   | 5  | 7  | 10 | 11 | 9     | 180.0 | 0.9205   | 2;   |
|   | 5  | 7  | 10 | 11 | 9     | 0.0   | 0.0377   | 3;   |
|   | 6  | 5  | 3  | 8  | 1     | 180.0 | 6.2760   | 2;   |
|   | 6  | 5  | 7  | 10 | 1     | 180.0 | 6.2760   | 2;   |
|   | 7  | 1  | 8  | 9  | 1     | 180.0 | 8.3680   | 2;   |
|   | 7  | 5  | 3  | 8  | 1     | 180.0 | 50.2080  | 2;   |
| ; | 7  | 10 | 11 | 12 | 1     | 0.0   | 0.0000   | 0;   |
|   | 8  | 1  | 7  | 10 | 1     | 180.0 | 8.3680   | 2;   |
|   | 10 | 11 | 12 | 13 | 9     | 0.0   | -14.6440 | 1;   |
|   | 10 | 11 | 12 | 13 | 9     | 180.0 | 6.6944   | 2;   |
|   | 10 | 11 | 12 | 13 | 9     | 0.0   | 6.6944   | 3;   |
|   | 11 | 12 | 13 | 14 | 9     | 0.0   | -14.6440 | 1;   |

|    |    |    |    |   |       |          |    |
|----|----|----|----|---|-------|----------|----|
| 11 | 12 | 13 | 14 | 9 | 180.0 | 6.6944   | 2; |
| 11 | 12 | 13 | 14 | 9 | 0.0   | 6.6944   | 3; |
| 12 | 13 | 14 | 15 | 9 | 0.0   | -14.6440 | 1; |
| 12 | 13 | 14 | 15 | 9 | 180.0 | 6.6944   | 2; |
| 12 | 13 | 14 | 15 | 9 | 0.0   | 6.6944   | 3; |
| 13 | 14 | 15 | 16 | 9 | 0.0   | -14.6440 | 1; |
| 13 | 14 | 15 | 16 | 9 | 180.0 | 6.6944   | 2; |
| 13 | 14 | 15 | 16 | 9 | 0.0   | 6.6944   | 3; |
| 14 | 15 | 16 | 17 | 9 | 0.0   | -14.6440 | 1; |
| 14 | 15 | 16 | 17 | 9 | 180.0 | 6.6944   | 2; |
| 14 | 15 | 16 | 17 | 9 | 0.0   | 6.6944   | 3; |
| 15 | 16 | 17 | 18 | 9 | 0.0   | -14.6440 | 1; |
| 15 | 16 | 17 | 18 | 9 | 180.0 | 6.6944   | 2; |
| 15 | 16 | 17 | 18 | 9 | 0.0   | 6.6944   | 3; |
| 16 | 17 | 18 | 19 | 9 | 0.0   | -14.6440 | 1; |
| 16 | 17 | 18 | 19 | 9 | 180.0 | 6.6944   | 2; |
| 16 | 17 | 18 | 19 | 9 | 0.0   | 6.6944   | 3; |
| 17 | 18 | 19 | 20 | 9 | 0.0   | -14.6440 | 1; |
| 17 | 18 | 19 | 20 | 9 | 180.0 | 6.6944   | 2; |
| 17 | 18 | 19 | 20 | 9 | 0.0   | 6.6944   | 3; |
| 18 | 19 | 20 | 21 | 9 | 0.0   | -14.6440 | 1; |
| 18 | 19 | 20 | 21 | 9 | 180.0 | 6.6944   | 2; |
| 18 | 19 | 20 | 21 | 9 | 0.0   | 6.6944   | 3; |
| 1  | 3  | 8  | 9  | 4 | 180.0 | 8.3680   | 2; |
| 1  | 5  | 7  | 10 | 4 | 180.0 | 8.3680   | 2; |
| 8  | 5  | 3  | 4  | 4 | 180.0 | 4.6024   | 2; |
| 8  | 7  | 1  | 2  | 4 | 180.0 | 4.6024   | 2; |
| 7  | 3  | 5  | 6  | 4 | 180.0 | 4.6024   | 2; |

## Anions

bf4.itp

```
[ moleculetype ]
; Name          nrexcl
BF4             3

[ atoms ]
;  nr      type  resnr  residue  atom  cgnr   charge   mass
   1       BB    1      BF4     B1    1     0.428000  10.8110
   2       FF    1      BF4     F2    2    -0.307000  18.9984
   3       FF    1      BF4     F3    3    -0.307000  18.9984
   4       FF    1      BF4     F4    4    -0.307000  18.9984
   5       FF    1      BF4     F5    5    -0.307000  18.9984

[ bonds ]
;  ai    aj  funct      r      k
   1     2    1     0.13900  2.5104e+05
   1     3    1     0.13900  2.5104e+05
   1     4    1     0.13900  2.5104e+05
```

```

1      5      1      0.13900      2.5104e+05

[ pairs ]
; ai    aj    funct

[ angles ]
; ai    aj    ak    funct    theta    cth
  2     1     3     1    1.0950e+02  4.1840e+02
  2     1     4     1    1.0950e+02  4.1840e+02
  2     1     5     1    1.0950e+02  4.1840e+02
  3     1     4     1    1.0950e+02  4.1840e+02
  3     1     5     1    1.0950e+02  4.1840e+02
  4     1     5     1    1.0950e+02  4.1840e+02

```

pf6.itp

```

[ moleculetype ]
; Name          nrexcl
PF6             3

[ atoms ]
; nr      type  resnr  residue  atom  cgnr  charge  mass
  1       PP    1      PF6     P1    1     0.442000  30.9738
  2       FF    1      PF6     F2    2    -0.207000  18.9984
  3       FF    1      PF6     F3    3    -0.207000  18.9984
  4       FF    1      PF6     F4    4    -0.207000  18.9984
  5       FF    1      PF6     F5    5    -0.207000  18.9984
  6       FF    1      PF6     F6    6    -0.207000  18.9984
  7       FF    1      PF6     F7    7    -0.207000  18.9984

[ bonds ]
; ai    aj    funct    r      k
  1     2     1      0.16000  1.6736e+05
  1     3     1      0.16000  1.6736e+05
  1     4     1      0.16000  1.6736e+05
  1     5     1      0.16000  1.6736e+05
  1     6     1      0.16000  1.6736e+05
  1     7     1      0.16000  1.6736e+05

[ pairs ]
; ai    aj    funct

[ angles ]
; ai    aj    ak    funct    theta    cth
  2     1     3     1    9.0000e+01  8.3680e+02
  2     1     4     1    9.0000e+01  8.3680e+02
  2     1     5     1    9.0000e+01  8.3680e+02
  3     1     4     1    9.0000e+01  8.3680e+02
  3     1     5     1    9.0000e+01  8.3680e+02
  4     1     5     1    9.0000e+01  8.3680e+02

```

6 1 7 1 9.0000e+01 8.3680e+02

ntf2.itp

```
[ moleculetype ]
; Name          nrexcl
TFN             3

[ atoms ]
;  nr      type  resnr  residue  atom  cgnr  charge  mass
   1       NF    1     TFN    NN1   1     -0.2720 14.0067
   2       SF    1     TFN    SS2   2       0.6270 32.0650
   3       SF    1     TFN    SS3   3       0.6270 32.0650
   4       OF    1     TFN    OO4   4     -0.3980 15.9994
   5       OF    1     TFN    OO5   5     -0.3980 15.9994
   6       OF    1     TFN    OO6   6     -0.3980 15.9994
   7       OF    1     TFN    OO7   7     -0.3980 15.9994
   8      CF3    1     TFN    CF8   8     -0.0950 69.0059
   9      CF3    1     TFN    CF9   9     -0.0950 69.0059

[ bonds ]
;  ai    aj  funct      r      k
   1     2    1     0.15700 4.5322e+05
   1     3    1     0.15700 4.5322e+05
   2     4    1     0.14500 9.0558e+05
   2     5    1     0.14500 9.0558e+05
   2     8    1     0.24000 2.6326e+05
   3     6    1     0.14500 9.0558e+05
   3     7    1     0.14500 9.0558e+05
   3     9    1     0.24000 2.6326e+05

[ pairs ]
;  ai    aj  funct
   2     6    1
   2     7    1
   2     9    1
   3     4    1
   3     5    1
   3     8    1

[ angles ]
;  ai    aj  ak  funct  theta  cth
   2     1    3    1 1.2520e+02 1.0242e+03
   1     2    4    1 1.1270e+02 1.1749e+03
   1     2    5    1 1.1270e+02 1.1749e+03
   1     2    8    1 1.0590e+02 1.3205e+03
   4     2    5    1 1.1460e+02 1.2485e+03
   4     2    8    1 1.0320e+02 1.2803e+03
   5     2    8    1 1.0320e+02 1.2803e+03
   1     3    6    1 1.1270e+02 1.1749e+03
```

```

1      3      7      1  1.1270e+02  1.1749e+03
1      3      9      1  1.0590e+02  1.3205e+03
6      3      7      1  1.1460e+02  1.2485e+03
6      3      9      1  1.0320e+02  1.2803e+03
7      3      9      1  1.0320e+02  1.2803e+03

```

[ dihedrals ]

```

; ai   aj   ak   al funct  theta      cth      mult
2    1    3    6     1     0.0      3.3472    3;
2    1    3    7     1     0.0      3.3472    3;
2    1    3    9     9    180.0     3.8325    1;
2    1    3    9     9     0.0     -4.3723    2;
2    1    3    9     9     0.0     -1.5983    3;
3    1    2    4     1     0.0      3.3472    3;
3    1    2    5     1     0.0      3.3472    3;
3    1    2    8     9     0.0      3.8325    1;
3    1    2    8     9    180.0     -4.3723    2;
3    1    2    8     9     0.0     -1.5983    3;

```

cl.itp

```

[ moleculetype ]
; molname  nrexcl
CLA        1

```

```

[ atoms ]
; id      at type res nr  residu name at name  cg nr  charge  mass
1        CLA      1      CLA      CLA      CLA      1     -0.8    35.4530

```

## Water

spc.itp

```

[ moleculetype ]
; molname  nrexcl
SOL        2

```

```

[ atoms ]
; nr  type  resnr residue  atom  cgnr  charge  mass
#ifndef HEAVY_H
1     OW    1     SOL     OW     1     -0.82   15.99940
2     H     1     SOL     HW1    1     0.41    1.00800
3     H     1     SOL     HW2    1     0.41    1.00800
#else
1     OW    1     SOL     OW     1     -0.82   9.95140
2     H     1     SOL     HW1    1     0.41    4.03200
3     H     1     SOL     HW2    1     0.41    4.03200
#endif
#endif FLEXIBLE

```

```

[ settles ]
; OW      funct      doh      dhh
1         1         0.1      0.16330

[ exclusions ]
1         2         3
2         1         3
3         1         2
#else
[ bonds ]
; i       j         funct      length      force.c.
1         2         1         0.1         345000      0.1         345000
1         3         1         0.1         345000      0.1         345000

[ angles ]
; i       j         k         funct      angle      force.c.
2         1         3         1         109.47      383         109.47      383
#endif

```

## Lipid

### popc.itp

```

[ moleculetype ]
; Name      nrexcl
POP        3

[ atoms ]
;  nr      type      resnr  residu      atom      cgnr      charge      mass
1         LC3        1       POP         C1         0         0.4000      15.0350
2         LC3        1       POP         C2         0         0.4000      15.0350
3         LC3        1       POP         C3         0         0.4000      15.0350
4         LNL        1       POP         N4         0         -0.5000     14.0067
5         LH2        1       POP         C5         0         0.3000      14.0270
6         LC2        1       POP         C6         1         0.4000      14.0270
7         LOS        1       POP         O7         1         -0.800      15.9994
8         LP         1       POP         P8         1         1.700      30.9738
9         LOM        1       POP         O9         1         -0.800      15.9994
10        LOM        1       POP         O10        1         -0.800      15.9994
11        LOS        1       POP         O11        1         -0.700      15.9994
12        LC2        1       POP         C12        2         0.400      14.0270
13        LH1        1       POP         C13        2         0.300      13.0190
14        LOS        1       POP         O14        2         -0.700      15.9994
15        LC         1       POP         C15        2         0.7000     12.0110
16        LO         1       POP         O16        2         -0.700      15.9994
17        LP2        1       POP         C17        3         0.0         14.0270
18        LP2        1       POP         C18        4         0           14.0270
19        LP2        1       POP         C19        5         0           14.0270
20        LP2        1       POP         C20        6         0           14.0270
21        LP2        1       POP         C21        7         0           14.0270
22        LP2        1       POP         C22        8         0           14.0270

```

|    |     |   |     |     |    |       |         |
|----|-----|---|-----|-----|----|-------|---------|
| 23 | LP2 | 1 | POP | C23 | 9  | 0     | 14.0270 |
| 24 | LH1 | 1 | POP | C24 | 10 | 0     | 13.0190 |
| 25 | LH1 | 1 | POP | C25 | 11 | 0     | 13.0190 |
| 26 | LP2 | 1 | POP | C26 | 12 | 0     | 14.0270 |
| 27 | LP2 | 1 | POP | C27 | 13 | 0     | 14.0270 |
| 28 | LP2 | 1 | POP | C28 | 14 | 0     | 14.0270 |
| 29 | LP2 | 1 | POP | C29 | 15 | 0     | 14.0270 |
| 30 | LP2 | 1 | POP | C30 | 16 | 0     | 14.0270 |
| 31 | LP2 | 1 | POP | C31 | 17 | 0     | 14.0270 |
| 32 | LC2 | 1 | POP | C32 | 18 | 0.50  | 14.0270 |
| 33 | LOS | 1 | POP | O33 | 18 | -0.70 | 15.9994 |
| 34 | LC  | 1 | POP | C34 | 18 | 0.800 | 12.0110 |
| 35 | LO  | 1 | POP | O35 | 18 | -0.60 | 15.9994 |
| 36 | LP2 | 1 | POP | C36 | 19 | 0     | 14.0270 |
| 37 | LP2 | 1 | POP | C37 | 20 | 0     | 14.0270 |
| 38 | LP2 | 1 | POP | C38 | 21 | 0     | 14.0270 |
| 39 | LP2 | 1 | POP | C39 | 22 | 0     | 14.0270 |
| 40 | LP2 | 1 | POP | C40 | 23 | 0     | 14.0270 |
| 41 | LP2 | 1 | POP | C41 | 24 | 0     | 14.0270 |
| 42 | LP2 | 1 | POP | C42 | 25 | 0     | 14.0270 |
| 43 | LP2 | 1 | POP | C43 | 26 | 0     | 14.0270 |
| 44 | LP2 | 1 | POP | C44 | 27 | 0     | 14.0270 |
| 45 | LP2 | 1 | POP | C45 | 28 | 0     | 14.0270 |
| 46 | LP2 | 1 | POP | C46 | 29 | 0     | 14.0270 |
| 47 | LP2 | 1 | POP | C47 | 30 | 0     | 14.0270 |
| 48 | LP2 | 1 | POP | C48 | 31 | 0     | 14.0270 |
| 49 | LP2 | 1 | POP | C49 | 32 | 0     | 14.0270 |
| 50 | LP3 | 1 | POP | C50 | 33 | 0     | 15.0350 |
| 51 | LP2 | 1 | POP | CA1 | 34 | 0     | 14.0270 |
| 52 | LP3 | 1 | POP | CA2 | 35 | 0     | 15.0350 |

[ bonds ]

| ; ai |    | aj funct |                         |
|------|----|----------|-------------------------|
| 4    | 5  | 1        | 0.14700E+00 0.37660E+06 |
| 5    | 6  | 1        | 0.15300E+00 0.33470E+06 |
| 6    | 7  | 1        | 0.14300E+00 0.25100E+06 |
| 7    | 8  | 1        | 0.16100E+00 0.25100E+06 |
| 8    | 9  | 1        | 0.14800E+00 0.37660E+06 |
| 8    | 10 | 1        | 0.14800E+00 0.37660E+06 |
| 8    | 11 | 1        | 0.16100E+00 0.25100E+06 |
| 11   | 12 | 1        | 0.14300E+00 0.25100E+06 |
| 12   | 13 | 1        | 0.15300E+00 0.33470E+06 |
| 13   | 14 | 1        | 0.14350E+00 0.25100E+06 |
| 13   | 32 | 1        | 0.15300E+00 0.33470E+06 |
| 14   | 15 | 1        | 0.13600E+00 0.37660E+06 |
| 15   | 16 | 1        | 0.12300E+00 0.50210E+06 |
| 15   | 17 | 1        | 0.15300E+00 0.33470E+06 |
| 17   | 18 | 1        | 0.15300E+00 0.33470E+06 |
| 18   | 19 | 1        | 0.15300E+00 0.33470E+06 |
| 19   | 20 | 1        | 0.15300E+00 0.33470E+06 |
| 20   | 21 | 1        | 0.15300E+00 0.33470E+06 |
| 21   | 22 | 1        | 0.15300E+00 0.33470E+06 |

|    |    |   |             |             |
|----|----|---|-------------|-------------|
| 22 | 23 | 1 | 0.15300E+00 | 0.33470E+06 |
| 23 | 24 | 1 | 0.15300E+00 | 0.33470E+06 |
| 24 | 25 | 1 | 0.13900E+00 | 0.41840E+06 |
| 25 | 26 | 1 | 0.15300E+00 | 0.33470E+06 |
| 26 | 27 | 1 | 0.15300E+00 | 0.33470E+06 |
| 27 | 28 | 1 | 0.15300E+00 | 0.33470E+06 |
| 28 | 29 | 1 | 0.15300E+00 | 0.33470E+06 |
| 29 | 30 | 1 | 0.15300E+00 | 0.33470E+06 |
| 30 | 31 | 1 | 0.15300E+00 | 0.33470E+06 |
| 31 | 51 | 1 | 0.15300E+00 | 0.33470E+06 |
| 51 | 52 | 1 | 0.15300E+00 | 0.33470E+06 |
| 32 | 33 | 1 | 0.14300E+00 | 0.25100E+06 |
| 33 | 34 | 1 | 0.13600E+00 | 0.37660E+06 |
| 34 | 35 | 1 | 0.12300E+00 | 0.50210E+06 |
| 34 | 36 | 1 | 0.15300E+00 | 0.33470E+06 |
| 36 | 37 | 1 | 0.15300E+00 | 0.33470E+06 |
| 37 | 38 | 1 | 0.15300E+00 | 0.33470E+06 |
| 38 | 39 | 1 | 0.15300E+00 | 0.33470E+06 |
| 39 | 40 | 1 | 0.15300E+00 | 0.33470E+06 |
| 40 | 41 | 1 | 0.15300E+00 | 0.33470E+06 |
| 41 | 42 | 1 | 0.15300E+00 | 0.33470E+06 |
| 42 | 43 | 1 | 0.15300E+00 | 0.33470E+06 |
| 43 | 44 | 1 | 0.15300E+00 | 0.33470E+06 |
| 44 | 45 | 1 | 0.15300E+00 | 0.33470E+06 |
| 45 | 46 | 1 | 0.15300E+00 | 0.33470E+06 |
| 46 | 47 | 1 | 0.15300E+00 | 0.33470E+06 |
| 47 | 48 | 1 | 0.15300E+00 | 0.33470E+06 |
| 48 | 49 | 1 | 0.15300E+00 | 0.33470E+06 |
| 49 | 50 | 1 | 0.15300E+00 | 0.33470E+06 |
| 1  | 4  | 1 | 0.14700E+00 | 0.37450E+06 |
| 2  | 4  | 1 | 0.14700E+00 | 0.37450E+06 |
| 3  | 4  | 1 | 0.14700E+00 | 0.37450E+06 |

[ pairs ]

| ; | ai | aj | funct |
|---|----|----|-------|
|   | 1  | 6  | 1     |
|   | 2  | 6  | 1     |
|   | 3  | 6  | 1     |
|   | 4  | 7  | 1     |
|   | 5  | 8  | 1     |
|   | 6  | 9  | 1     |
|   | 6  | 10 | 1     |
|   | 6  | 11 | 1     |
|   | 7  | 12 | 1     |
|   | 8  | 13 | 1     |
|   | 9  | 12 | 1     |
|   | 10 | 12 | 1     |
|   | 11 | 14 | 1     |
|   | 11 | 32 | 1     |
|   | 12 | 15 | 1     |
|   | 12 | 33 | 1     |
|   | 13 | 16 | 1     |

```

13  17  1
13  34  1
14  18  1
14  33  1
15  19  1
15  32  1
16  18  1
22  25  1    ; pair around double bond
24  27  1    ; pair around double bond
32  35  1
32  36  1
33  37  1
34  38  1
35  37  1
;;list pairs twice to account for 1.0 fudge QQ for lipid
  1   6   1
  2   6   1
  3   6   1
  4   7   1
  5   8   1
  6   9   1
  6  10   1
  6  11   1
  7  12   1
  8  13   1
  9  12   1
10  12   1
11  14   1
11  32   1
12  15   1
12  33   1
13  16   1
13  17   1
13  34   1
14  18   1
14  33   1
15  19   1
15  32   1
16  18   1
22  25   1    ; pair around double bond
24  27   1    ; pair around double bond
32  35   1
32  36   1
33  37   1
34  38   1
35  37   1

[ angles ]
;  ai   aj   ak funct
   4    5    6    1 0.10950E+03 0.46020E+03
   5    6    7    1 0.10950E+03 0.46020E+03
   6    7    8    1 0.12000E+03 0.39750E+03

```

|    |    |    |    |             |                         |
|----|----|----|----|-------------|-------------------------|
| 7  | 8  | 9  | 1  | 0.10960E+03 | 0.39750E+03             |
| 7  | 8  | 10 | 1  | 0.10960E+03 | 0.39750E+03             |
| 7  | 8  | 11 | 1  | 0.10300E+03 | 0.39750E+03             |
| 8  | 11 | 12 | 1  | 0.12000E+03 | 0.39750E+03             |
| 9  | 8  | 10 | 1  | 0.12000E+03 | 0.58580E+03             |
| 9  | 8  | 11 | 1  | 0.10960E+03 | 0.39750E+03             |
| 10 | 8  | 11 | 1  | 0.10960E+03 | 0.39750E+03             |
| 11 | 12 | 13 | 1  | 0.11100E+03 | 0.46020E+03             |
| 12 | 13 | 14 | 1  | 0.10950E+03 | 0.46020E+03             |
| 12 | 13 | 32 | 1  | 0.10950E+03 | 0.46020E+03             |
| 13 | 14 | 15 | 1  | 0.12000E+03 | 0.41840E+03             |
| 13 | 32 | 33 | 1  | 0.11100E+03 | 0.46020E+03             |
| 14 | 13 | 32 | 1  | 0.10950E+03 | 0.46020E+03             |
| 14 | 15 | 16 | 1  | 0.12400E+03 | 0.50210E+03             |
| 14 | 15 | 17 | 1  | 0.11500E+03 | 0.50210E+03             |
| 15 | 17 | 18 | 1  | 0.11100E+03 | 0.46020E+03             |
| 16 | 15 | 17 | 1  | 0.12100E+03 | 0.50210E+03             |
| 17 | 18 | 19 | 1  | 0.11100E+03 | 0.46020E+03             |
| 18 | 19 | 20 | 1  | 0.11100E+03 | 0.46020E+03             |
| 19 | 20 | 21 | 1  | 0.11100E+03 | 0.46020E+03             |
| 20 | 21 | 22 | 1  | 0.11100E+03 | 0.46020E+03             |
| 21 | 22 | 23 | 1  | 0.11100E+03 | 0.46020E+03             |
| 22 | 23 | 24 | 1  | 0.11100E+03 | 0.46020E+03             |
| 23 | 24 | 25 | 1  | 120.000     | 502.080 ; cis thingies  |
| 24 | 25 | 26 | 1  | 120.000     | 502.080 ; cis thingies  |
|    | 25 | 26 | 27 | 1           | 0.11100E+03 0.46020E+03 |
|    | 26 | 27 | 28 | 1           | 0.11100E+03 0.46020E+03 |
|    | 27 | 28 | 29 | 1           | 0.11100E+03 0.46020E+03 |
|    | 28 | 29 | 30 | 1           | 0.11100E+03 0.46020E+03 |
|    | 29 | 30 | 31 | 1           | 0.11100E+03 0.46020E+03 |
| 30 | 31 | 51 | 1  | 0.11100E+03 | 0.46020E+03             |
| 31 | 51 | 52 | 1  | 0.11100E+03 | 0.46020E+03             |
|    | 32 | 33 | 34 | 1           | 0.12000E+03 0.41840E+03 |
|    | 33 | 34 | 35 | 1           | 0.12400E+03 0.50210E+03 |
|    | 33 | 34 | 36 | 1           | 0.11500E+03 0.50210E+03 |
|    | 34 | 36 | 37 | 1           | 0.11100E+03 0.46020E+03 |
|    | 35 | 34 | 36 | 1           | 0.12100E+03 0.50210E+03 |
|    | 36 | 37 | 38 | 1           | 0.11100E+03 0.46020E+03 |
|    | 37 | 38 | 39 | 1           | 0.11100E+03 0.46020E+03 |
|    | 38 | 39 | 40 | 1           | 0.11100E+03 0.46020E+03 |
|    | 39 | 40 | 41 | 1           | 0.11100E+03 0.46020E+03 |
|    | 40 | 41 | 42 | 1           | 0.11100E+03 0.46020E+03 |
|    | 41 | 42 | 43 | 1           | 0.11100E+03 0.46020E+03 |
|    | 42 | 43 | 44 | 1           | 0.11100E+03 0.46020E+03 |
|    | 43 | 44 | 45 | 1           | 0.11100E+03 0.46020E+03 |
|    | 44 | 45 | 46 | 1           | 0.11100E+03 0.46020E+03 |
|    | 45 | 46 | 47 | 1           | 0.11100E+03 0.46020E+03 |
|    | 46 | 47 | 48 | 1           | 0.11100E+03 0.46020E+03 |
|    | 47 | 48 | 49 | 1           | 0.11100E+03 0.46020E+03 |
|    | 48 | 49 | 50 | 1           | 0.11100E+03 0.46020E+03 |
|    | 1  | 4  | 2  | 1           | 0.10950E+03 0.33470E+03 |
|    | 2  | 4  | 3  | 1           | 0.10950E+03 0.33470E+03 |

|   |   |   |   |             |             |
|---|---|---|---|-------------|-------------|
| 3 | 4 | 1 | 1 | 0.10950E+03 | 0.33470E+03 |
| 1 | 4 | 5 | 1 | 0.10950E+03 | 0.37660E+03 |
| 2 | 4 | 5 | 1 | 0.10950E+03 | 0.37660E+03 |
| 3 | 4 | 5 | 1 | 0.10950E+03 | 0.37660E+03 |

[ dihedrals ]

| ; ai | aj | ak | al | funct | phi0  | cp    | mult |
|------|----|----|----|-------|-------|-------|------|
| 1    | 4  | 5  | 6  | 1     | 0.0   | 3.76  | 3    |
| 4    | 5  | 6  | 7  | 1     | 0.0   | 5.85  | 3    |
| 5    | 6  | 7  | 8  | 1     | 0.0   | 3.76  | 3    |
| 6    | 7  | 8  | 11 | 1     | 0.0   | 1.05  | 3    |
| 6    | 7  | 8  | 11 | 1     | 0.0   | 3.14  | 2    |
| 7    | 8  | 11 | 12 | 1     | 0.0   | 1.05  | 3    |
| 7    | 8  | 11 | 12 | 1     | 0.0   | 3.14  | 2    |
| 8    | 11 | 12 | 13 | 1     | 0.0   | 3.76  | 3    |
| 11   | 12 | 13 | 14 | 1     | 0.0   | 2.09  | 2    |
| 11   | 12 | 13 | 32 | 1     | 0.0   | 5.85  | 3    |
| 11   | 12 | 13 | 32 | 1     | 0.0   | 0.42  | 2    |
| 12   | 13 | 32 | 33 | 1     | 0.0   | 5.85  | 3    |
| 12   | 13 | 32 | 33 | 1     | 0.0   | 0.42  | 2    |
| 12   | 13 | 14 | 15 | 1     | 0.0   | 3.77  | 3    |
| 13   | 32 | 33 | 34 | 1     | 0.0   | 3.76  | 3    |
| 13   | 14 | 15 | 17 | 1     | 180.0 | 16.74 | 2    |
| 14   | 13 | 32 | 33 | 1     | 0.0   | 2.09  | 2    |
| 14   | 15 | 17 | 18 | 1     | 0.0   | 0.42  | 6    |
| 15   | 17 | 18 | 19 | 1     | 0.0   | 5.86  | 3    |
| 17   | 18 | 19 | 20 | 3     |       |       |      |
| 18   | 19 | 20 | 21 | 3     |       |       |      |
| 19   | 20 | 21 | 22 | 3     |       |       |      |
| 20   | 21 | 22 | 23 | 3     |       |       |      |
| 21   | 22 | 23 | 24 | 3     |       |       |      |
| 22   | 23 | 24 | 25 | 1     | 0.000 | 5.858 | 3    |
| ; 23 | 24 | 25 | 26 | 1     |       |       |      |
| 24   | 25 | 26 | 27 | 1     | 0.000 | 5.858 | 3    |
| 25   | 26 | 27 | 28 | 3     |       |       |      |
| 26   | 27 | 28 | 29 | 3     |       |       |      |
| 27   | 28 | 29 | 30 | 3     |       |       |      |
| 28   | 29 | 30 | 31 | 3     |       |       |      |
| 29   | 30 | 31 | 51 | 3     |       |       |      |
| 30   | 31 | 51 | 52 | 3     |       |       |      |
| 13   | 32 | 33 | 34 | 1     | 0.0   | 3.76  | 3    |
| 32   | 33 | 34 | 36 | 1     | 180.0 | 16.74 | 2    |
| 33   | 34 | 36 | 37 | 1     | 0.0   | 0.42  | 6    |
| 34   | 36 | 37 | 38 | 1     | 0.0   | 5.86  | 3    |
| 36   | 37 | 38 | 39 | 3     |       |       |      |
| 37   | 38 | 39 | 40 | 3     |       |       |      |
| 38   | 39 | 40 | 41 | 3     |       |       |      |
| 39   | 40 | 41 | 42 | 3     |       |       |      |
| 40   | 41 | 42 | 43 | 3     |       |       |      |
| 41   | 42 | 43 | 44 | 3     |       |       |      |
| 42   | 43 | 44 | 45 | 3     |       |       |      |
| 43   | 44 | 45 | 46 | 3     |       |       |      |

```

44 45 46 47 3
45 46 47 48 3
46 47 48 49 3
47 48 49 50 3

[ dihedrals ]
; ai aj ak al funct
13 14 32 12 2 35.264 0.33470E+03
15 14 17 16 2 0.00000E+00 0.16740E+03
34 33 36 35 2 0.00000E+00 0.16740E+03
23 24 25 26 2 0.000 167.360

#ifdef POSRES_LIPID
#include "lipid_posre.itp"
#endif

```

### Nonbonded Interactions

```

[ defaults ]
; nbfunc comb-rule gen-pairs fudgeLJ fudgeQQ
1 1 no 0.5 0.5

[ atomtypes ]
LO 8 15.9994 0.000 A 2.36400e-03 1.59000e-06 ;carbonyl O, OPLS
LOM 8 15.9994 0.000 A 2.36400e-03 1.59000e-06 ;carboxyl O, OPLS
LNL 7 14.0067 0.000 A 3.35300e-03 3.95100e-06 ;Nitrogen, OPLS
LC 6 12.0110 0.000 A 4.88800e-03 1.35900e-05 ;Carbonyl C, OPLS
LH1 6 13.0190 0.000 A 4.03100e-03 1.21400e-05 ;CH1, OPLS
LH2 6 14.0270 0.000 A 7.00200e-03 2.48300e-05 ;CH2, OPLS
LP 15 30.9738 0.000 A 9.16000e-03 2.50700e-05 ;phosphor, OPLS
LOS 8 15.9994 0.000 A 2.56300e-03 1.86800e-06 ;ester oxygen, OPLS
LP2 6 14.0270 0.000 A 5.87400e-03 2.26500e-05 ;RB CH2, Bergers LJ
LP3 6 15.0350 0.000 A 8.77700e-03 3.38500e-05 ;RB CH3, Bergers LJ
LC3 6 15.0350 0.000 A 9.35700e-03 3.60900e-05 ;CH3, OPLS
LC2 6 14.0270 0.000 A 5.94700e-03 1.79000e-05 ;CH2, OPLS
CR 6 13.0190 0.0000 A 2.223430e-03 3.43477e-06
H5 1 1.0079 0.0000 A 1.887870e-06 7.09856e-12
CW 6 13.0190 0.0000 A 2.223430e-03 3.43477e-06
H4 1 1.0079 0.0000 A 8.550650e-06 1.45621e-10
NA 7 14.0067 0.0000 A 3.352750e-03 3.95094e-06
CN3 6 15.0350 0.0000 A 9.772510e-03 3.00336e-05
CN2 6 14.0270 0.0000 A 7.407710e-03 2.30902e-05
CTA 6 14.0270 0.0000 A 8.416010e-03 3.18206e-05
CT2 6 14.0270 0.0000 A 8.416010e-03 3.18206e-05
CT3 6 15.0350 0.0000 A 1.092820e-02 3.85719e-05
NF 7 14.0067 0.0000 A 8.013260e+02 9.44298e+05
SF 16 32.0650 0.0000 A 2.049400e+03 4.20003e+06
OF 8 15.9994 0.0000 A 5.649750e+02 3.79997e+05
CF3 6 69.0059 0.0000 A 5.119070e+03 4.09451e+07
CLA 17 0.000 0.000 A 6.89232E-03 1.89229E-05
PP 15 30.9738 0.442000 A 1.073170e-02 3.44078e-05
FF 9 18.9984 -0.207000 A 9.534550e-04 8.76106e-07

```

BB 1 0 0 A 0 0

[ nonbond\_params ]

|     |     |   |             |             |
|-----|-----|---|-------------|-------------|
| LO  | LO  | 1 | 2.36400e-03 | 1.59000e-06 |
| LO  | LOM | 1 | 2.36400e-03 | 1.59000e-06 |
| LO  | LNL | 1 | 2.81600e-03 | 2.50600e-06 |
| LO  | LC  | 1 | 3.39900e-03 | 4.64800e-06 |
| LO  | LH1 | 1 | 3.08700e-03 | 4.39300e-06 |
| LO  | LH2 | 1 | 4.06900e-03 | 6.28300e-06 |
| LO  | LP  | 1 | 4.65300e-03 | 6.31300e-06 |
| LO  | LOS | 1 | 2.46100e-03 | 1.72300e-06 |
| LO  | LP2 | 1 | 3.72700e-03 | 6.00000e-06 |
| LO  | LP3 | 1 | 4.55500e-03 | 7.33500e-06 |
| LO  | LC3 | 1 | 4.70300e-03 | 7.57400e-06 |
| LO  | LC2 | 1 | 3.74900e-03 | 5.33500e-06 |
| LOM | LOM | 1 | 2.36400e-03 | 1.59000e-06 |
| LOM | LNL | 1 | 2.81600e-03 | 2.50600e-06 |
| LOM | LC  | 1 | 3.39900e-03 | 4.64800e-06 |
| LOM | LH1 | 1 | 3.08700e-03 | 4.39300e-06 |
| LOM | LH2 | 1 | 4.06900e-03 | 6.28300e-06 |
| LOM | LP  | 1 | 4.65300e-03 | 6.31300e-06 |
| LOM | LOS | 1 | 2.46100e-03 | 1.72300e-06 |
| LOM | LP2 | 1 | 3.72700e-03 | 6.00000e-06 |
| LOM | LP3 | 1 | 4.55500e-03 | 7.33500e-06 |
| LOM | LC3 | 1 | 4.70300e-03 | 7.57400e-06 |
| LOM | LC2 | 1 | 3.74900e-03 | 5.33500e-06 |
| LNL | LNL | 1 | 3.35300e-03 | 3.95100e-06 |
| LNL | LC  | 1 | 4.04900e-03 | 7.32800e-06 |
| LNL | LH1 | 1 | 3.67700e-03 | 6.92500e-06 |
| LNL | LH2 | 1 | 4.84600e-03 | 9.90500e-06 |
| LNL | LP  | 1 | 5.54200e-03 | 9.95300e-06 |
| LNL | LOS | 1 | 2.93200e-03 | 2.71700e-06 |
| LNL | LP2 | 1 | 4.43800e-03 | 9.46000e-06 |
| LNL | LP3 | 1 | 5.42500e-03 | 1.15600e-05 |
| LNL | LC3 | 1 | 5.60100e-03 | 1.19400e-05 |
| LNL | LC2 | 1 | 4.46600e-03 | 8.41100e-06 |
| LC  | LC  | 1 | 4.88800e-03 | 1.35900e-05 |
| LC  | LH1 | 1 | 4.43900e-03 | 1.28400e-05 |
| LC  | LH2 | 1 | 5.85100e-03 | 1.83700e-05 |
| LC  | LP  | 1 | 6.69100e-03 | 1.84600e-05 |
| LC  | LOS | 1 | 3.53900e-03 | 5.03800e-06 |
| LC  | LP2 | 1 | 5.35900e-03 | 1.75400e-05 |
| LC  | LP3 | 1 | 6.55000e-03 | 2.14500e-05 |
| LC  | LC3 | 1 | 6.76300e-03 | 2.21500e-05 |
| LC  | LC2 | 1 | 5.39100e-03 | 1.56000e-05 |
| LH1 | LH1 | 1 | 4.03100e-03 | 1.21400e-05 |
| LH1 | LH2 | 1 | 5.31300e-03 | 1.73600e-05 |
| LH1 | LP  | 1 | 6.07700e-03 | 1.74400e-05 |
| LH1 | LOS | 1 | 3.21400e-03 | 4.76100e-06 |
| LH1 | LP2 | 1 | 4.86600e-03 | 1.65800e-05 |
| LH1 | LP3 | 1 | 5.94800e-03 | 2.02700e-05 |
| LH1 | LC3 | 1 | 6.14200e-03 | 2.09300e-05 |

|                                |     |   |              |              |
|--------------------------------|-----|---|--------------|--------------|
| LH1                            | LC2 | 1 | 4.89600e-03  | 1.47400e-05  |
| LH2                            | LH2 | 1 | 7.00200e-03  | 2.48300e-05  |
| LH2                            | LP  | 1 | 8.00900e-03  | 2.49500e-05  |
| LH2                            | LOS | 1 | 4.23600e-03  | 6.81000e-06  |
| LH2                            | LP2 | 1 | 6.41400e-03  | 2.37100e-05  |
| LH2                            | LP3 | 1 | 7.83900e-03  | 2.89900e-05  |
| LH2                            | LC3 | 1 | 8.09500e-03  | 2.99300e-05  |
| LH2                            | LC2 | 1 | 6.45300e-03  | 2.10800e-05  |
| LP                             | LP  | 1 | 9.16000e-03  | 2.50700e-05  |
| LP                             | LOS | 1 | 4.84500e-03  | 6.84200e-06  |
| LP                             | LP2 | 1 | 7.33500e-03  | 2.38300e-05  |
| LP                             | LP3 | 1 | 8.96600e-03  | 2.91300e-05  |
| LP                             | LC3 | 1 | 9.25800e-03  | 3.00800e-05  |
| LP                             | LC2 | 1 | 7.38100e-03  | 2.11900e-05  |
| LOS                            | LOS | 1 | 2.56300e-03  | 1.86800e-06  |
| LOS                            | LP2 | 1 | 3.88000e-03  | 6.50400e-06  |
| LOS                            | LP3 | 1 | 4.74300e-03  | 7.95100e-06  |
| LOS                            | LC3 | 1 | 4.89700e-03  | 8.21000e-06  |
| LOS                            | LC2 | 1 | 3.90400e-03  | 5.78200e-06  |
| LP2                            | LP2 | 1 | 5.87400e-03  | 2.26500e-05  |
| LP2                            | LP3 | 1 | 7.18000e-03  | 2.76900e-05  |
| LP2                            | LC3 | 1 | 7.41400e-03  | 2.85900e-05  |
| LP2                            | LC2 | 1 | 5.91000e-03  | 2.01400e-05  |
| LP3                            | LP3 | 1 | 8.77700e-03  | 3.38500e-05  |
| LP3                            | LC3 | 1 | 9.06200e-03  | 3.49500e-05  |
| LP3                            | LC2 | 1 | 7.22400e-03  | 2.46200e-05  |
| LC3                            | LC3 | 1 | 9.35700e-03  | 3.60900e-05  |
| LC3                            | LC2 | 1 | 7.45900e-03  | 2.54200e-05  |
| LC2                            | LC2 | 1 | 5.94700e-03  | 1.79000e-05  |
| ;; lipid-SPC/SPCE interactions |     |   |              |              |
| LO                             | OW  | 1 | 2.50200e-03  | 2.06700e-06  |
| LOM                            | OW  | 1 | 2.50200e-03  | 2.06700e-06  |
| LNL                            | OW  | 1 | 2.98000e-03  | 3.25900e-06  |
| LC                             | OW  | 1 | 3.59800e-03  | 6.04400e-06  |
| LH1                            | OW  | 1 | 3.26800e-03  | 5.71200e-06  |
| LH2                            | OW  | 1 | 4.30700e-03  | 8.17000e-06  |
| LP                             | OW  | 1 | 4.92600e-03  | 8.21000e-06  |
| LOS                            | OW  | 1 | 2.60500e-03  | 2.24100e-06  |
| LP2                            | OW  | 1 | 3.94400e-03  | 7.80300e-06  |
| LP3                            | OW  | 1 | 4.82100e-03  | 9.53900e-06  |
| LC3                            | OW  | 1 | 4.97800e-03  | 9.85000e-06  |
| LC2                            | OW  | 1 | 3.96900e-03  | 6.93800e-06  |
| LNL                            | H   | 1 | 0.000000e+00 | 0.000000e+00 |
| LOS                            | H   | 1 | 0.000000e+00 | 0.000000e+00 |
| LOM                            | H   | 1 | 0.000000e+00 | 0.000000e+00 |
| LO                             | H   | 1 | 0.000000e+00 | 0.000000e+00 |
| LP                             | H   | 1 | 0.000000e+00 | 0.000000e+00 |
| LC                             | H   | 1 | 0.000000e+00 | 0.000000e+00 |
| LH1                            | H   | 1 | 0.000000e+00 | 0.000000e+00 |
| LC2                            | H   | 1 | 0.000000e+00 | 0.000000e+00 |
| LH2                            | H   | 1 | 0.000000e+00 | 0.000000e+00 |
| LP2                            | H   | 1 | 0.000000e+00 | 0.000000e+00 |

```

LP3      H      1  0.000000e+00  0.000000e+00
LC3      H      1  0.000000e+00  0.000000e+00
;;IL-IL nonbond interactions
  NA     NA      1  3.3527e-03  3.9509e-06
  NA     CR      1  2.7345e-03  3.6951e-06
  NA     CW      1  2.7345e-03  3.6951e-06
  NA     H5      1  1.5445e-04  1.9960e-08
  NA     H4      1  2.4426e-04  4.9920e-08
  NA     CN3     1  5.8346e-03  1.1318e-05
  NA     CN2     1  5.0827e-03  9.9350e-06
  NA     CTA     1  5.4643e-03  1.1865e-05
  NA     CT2     1  5.4643e-03  1.1865e-05
  NA     CT3     1  6.2065e-03  1.2979e-05
  NA     CLA     1  4.8792e-03  8.9080e-06
  NA     CF3     1  9.1437e-03  3.0291e-05
  NA     NF      1  3.3528e-03  3.9510e-06
  NA     SF      1  5.3961e-03  8.4394e-06
  NA     OF      1  2.8336e-03  2.5393e-06
  NA     PP      1  5.6244e-03  1.0251e-05
  NA     FF      1  1.7902e-03  1.8653e-06
  NA     BB      1  3.3912e-03  5.3790e-06
  CR     CR      1  2.2234e-03  3.4348e-06
  CR     CW      1  2.2234e-03  3.4348e-06
  CR     H5      1  1.3376e-04  2.1046e-08
  CR     H4      1  2.0854e-04  5.1157e-08
  CR     CN3     1  4.7075e-03  1.0359e-05
  CR     CN2     1  4.1002e-03  9.0902e-06
  CR     CTA     1  4.3985e-03  1.0809e-05
  CR     CT2     1  4.3985e-03  1.0809e-05
  CR     CT3     1  4.9999e-03  1.1842e-05
  CR     CLA     1  3.9417e-03  8.1738e-06
  CR     CF3     1  7.2993e-03  2.7140e-05
  CR     NF      1  2.7345e-03  3.6951e-06
  CR     SF      1  4.3736e-03  7.7950e-06
  CR     OF      1  2.3258e-03  2.4051e-06
  CR     PP      1  4.5439e-03  9.4066e-06
  CR     FF      1  1.4642e-03  1.7543e-06
  CR     BB      1  2.7478e-03  4.9653e-06
  CW     CW      1  2.2234e-03  3.4348e-06
  CW     H5      1  1.3376e-04  2.1046e-08
  CW     H4      1  2.0854e-04  5.1157e-08
  CW     CN3     1  4.7075e-03  1.0359e-05
  CW     CN2     1  4.1002e-03  9.0902e-06
  CW     CTA     1  4.3985e-03  1.0809e-05
  CW     CT2     1  4.3985e-03  1.0809e-05
  CW     CT3     1  4.9999e-03  1.1842e-05
  CW     CLA     1  3.9417e-03  8.1738e-06
  CW     CF3     1  7.2993e-03  2.7140e-05
  CW     NF      1  2.7345e-03  3.6951e-06
  CW     SF      1  4.3736e-03  7.7950e-06
  CW     OF      1  2.3258e-03  2.4051e-06
  CW     PP      1  4.5439e-03  9.4066e-06

```

|     |     |   |            |            |
|-----|-----|---|------------|------------|
| CW  | FF  | 1 | 1.4642e-03 | 1.7543e-06 |
| CW  | BB  | 1 | 2.7478e-03 | 4.9653e-06 |
| H5  | H5  | 1 | 1.8879e-06 | 7.0986e-12 |
| H5  | H4  | 1 | 4.2129e-06 | 3.5349e-11 |
| H5  | CN3 | 1 | 3.3137e-04 | 8.6903e-08 |
| H5  | CN2 | 1 | 2.8954e-04 | 7.6747e-08 |
| H5  | CTA | 1 | 3.2432e-04 | 9.9495e-08 |
| H5  | CT2 | 1 | 3.2432e-04 | 9.9495e-08 |
| H5  | CT3 | 1 | 3.6304e-04 | 1.0571e-07 |
| H5  | CLA | 1 | 2.7049e-04 | 6.5172e-08 |
| H5  | CF3 | 1 | 6.3387e-04 | 3.4653e-07 |
| H5  | NF  | 1 | 1.5445e-04 | 1.9960e-08 |
| H5  | SF  | 1 | 2.8081e-04 | 5.4406e-08 |
| H5  | OF  | 1 | 1.1507e-04 | 9.9683e-09 |
| H5  | PP  | 1 | 3.1159e-04 | 7.4893e-08 |
| H5  | FF  | 1 | 7.8007e-05 | 8.4306e-09 |
| H5  | BB  | 1 | 1.7751e-04 | 3.5085e-08 |
| H4  | H4  | 1 | 8.5506e-06 | 1.4562e-10 |
| H4  | CN3 | 1 | 4.9884e-04 | 1.9694e-07 |
| H4  | CN2 | 1 | 4.3557e-04 | 1.7368e-07 |
| H4  | CTA | 1 | 4.8327e-04 | 2.2092e-07 |
| H4  | CT2 | 1 | 4.8327e-04 | 2.2092e-07 |
| H4  | CT3 | 1 | 5.4279e-04 | 2.3630e-07 |
| H4  | CLA | 1 | 4.0950e-04 | 1.4936e-07 |
| H4  | CF3 | 1 | 9.1156e-04 | 7.1666e-07 |
| H4  | NF  | 1 | 2.4427e-04 | 4.9921e-08 |
| H4  | SF  | 1 | 4.3146e-04 | 1.2844e-07 |
| H4  | OF  | 1 | 1.8759e-04 | 2.6491e-08 |
| H4  | PP  | 1 | 4.7179e-04 | 1.7170e-07 |
| H4  | FF  | 1 | 1.2502e-04 | 2.1655e-08 |
| H4  | BB  | 1 | 2.7237e-04 | 8.2598e-08 |
| CN3 | CN3 | 1 | 9.7725e-03 | 3.0034e-05 |
| CN3 | CN2 | 1 | 8.5084e-03 | 2.6334e-05 |
| CN3 | CTA | 1 | 9.0770e-03 | 3.0970e-05 |
| CN3 | CT2 | 1 | 9.0770e-03 | 3.0970e-05 |
| CN3 | CT3 | 1 | 1.0338e-02 | 3.4063e-05 |
| CN3 | CLA | 1 | 8.2092e-03 | 2.3852e-05 |
| CN3 | CF3 | 1 | 1.4745e-02 | 7.4512e-05 |
| CN3 | NF  | 1 | 5.8346e-03 | 1.1318e-05 |
| CN3 | SF  | 1 | 9.1854e-03 | 2.3131e-05 |
| CN3 | OF  | 1 | 5.0424e-03 | 7.6057e-06 |
| CN3 | PP  | 1 | 9.4641e-03 | 2.7455e-05 |
| CN3 | FF  | 1 | 3.1464e-03 | 5.4502e-06 |
| CN3 | BB  | 1 | 5.7664e-03 | 1.4711e-05 |
| CN2 | CN2 | 1 | 7.4077e-03 | 2.3090e-05 |
| CN2 | CTA | 1 | 7.9019e-03 | 2.7148e-05 |
| CN2 | CT2 | 1 | 7.9019e-03 | 2.7148e-05 |
| CN2 | CT3 | 1 | 9.0003e-03 | 2.9863e-05 |
| CN2 | CLA | 1 | 7.1478e-03 | 2.0917e-05 |
| CN2 | CF3 | 1 | 1.2831e-02 | 6.5261e-05 |
| CN2 | NF  | 1 | 5.0828e-03 | 9.9351e-06 |
| CN2 | SF  | 1 | 7.9991e-03 | 2.0292e-05 |

|     |     |   |            |            |
|-----|-----|---|------------|------------|
| CN2 | OF  | 1 | 4.3940e-03 | 6.6808e-06 |
| CN2 | PP  | 1 | 8.2404e-03 | 2.4076e-05 |
| CN2 | FF  | 1 | 2.7414e-03 | 4.7857e-06 |
| CN2 | BB  | 1 | 5.0216e-03 | 1.2905e-05 |
| CTA | CTA | 1 | 8.4160e-03 | 3.1821e-05 |
| CTA | CT2 | 1 | 8.4160e-03 | 3.1821e-05 |
| CTA | CT3 | 1 | 9.5911e-03 | 3.5041e-05 |
| CTA | CLA | 1 | 7.6324e-03 | 2.4643e-05 |
| CTA | CF3 | 1 | 1.3583e-02 | 7.5577e-05 |
| CTA | NF  | 1 | 5.4643e-03 | 1.1865e-05 |
| CTA | SF  | 1 | 8.5616e-03 | 2.4019e-05 |
| CTA | OF  | 1 | 4.7450e-03 | 8.0499e-06 |
| CTA | PP  | 1 | 8.7994e-03 | 2.8367e-05 |
| CTA | FF  | 1 | 2.9530e-03 | 5.7380e-06 |
| CTA | BB  | 1 | 5.3736e-03 | 1.5269e-05 |
| CT2 | CT2 | 1 | 8.4160e-03 | 3.1821e-05 |
| CT2 | CT3 | 1 | 9.5911e-03 | 3.5041e-05 |
| CT2 | CLA | 1 | 7.6324e-03 | 2.4643e-05 |
| CT2 | CF3 | 1 | 1.3583e-02 | 7.5577e-05 |
| CT2 | NF  | 1 | 5.4643e-03 | 1.1865e-05 |
| CT2 | SF  | 1 | 8.5616e-03 | 2.4019e-05 |
| CT2 | OF  | 1 | 4.7450e-03 | 8.0499e-06 |
| CT2 | PP  | 1 | 8.7994e-03 | 2.8367e-05 |
| CT2 | FF  | 1 | 2.9530e-03 | 5.7380e-06 |
| CT2 | BB  | 1 | 5.3736e-03 | 1.5269e-05 |
| CT3 | CT3 | 1 | 1.0928e-02 | 3.8572e-05 |
| CT3 | CLA | 1 | 8.6901e-03 | 2.7088e-05 |
| CT3 | CF3 | 1 | 1.5513e-02 | 8.3583e-05 |
| CT3 | NF  | 1 | 6.2066e-03 | 1.2979e-05 |
| CT3 | SF  | 1 | 9.7399e-03 | 2.6357e-05 |
| CT3 | OF  | 1 | 5.3810e-03 | 8.7778e-06 |
| CT3 | PP  | 1 | 1.0019e-02 | 3.1180e-05 |
| CT3 | FF  | 1 | 3.3518e-03 | 6.2679e-06 |
| CT3 | BB  | 1 | 6.1136e-03 | 1.6758e-05 |
| CLA | CLA | 1 | 6.8923e-03 | 1.8923e-05 |
| CLA | CF3 | 1 | 1.2442e-02 | 5.9709e-05 |
| CLA | NF  | 1 | 4.8793e-03 | 8.9081e-06 |
| CLA | SF  | 1 | 7.7013e-03 | 1.8301e-05 |
| CLA | OF  | 1 | 4.2058e-03 | 5.9551e-06 |
| CLA | PP  | 1 | 7.9458e-03 | 2.1780e-05 |
| CLA | FF  | 1 | 2.6282e-03 | 4.2798e-06 |
| CLA | BB  | 1 | 4.8354e-03 | 1.1642e-05 |
| CF3 | CF3 | 1 | 2.1417e-02 | 1.7130e-04 |
| CF3 | NF  | 1 | 9.1438e-03 | 3.0292e-05 |
| CF3 | SF  | 1 | 1.4084e-02 | 5.9264e-05 |
| CF3 | OF  | 1 | 8.0770e-03 | 2.1267e-05 |
| CF3 | PP  | 1 | 1.4346e-02 | 6.8745e-05 |
| CF3 | FF  | 1 | 4.9793e-03 | 1.4874e-05 |
| CF3 | BB  | 1 | 8.8324e-03 | 3.7611e-05 |
| NF  | NF  | 1 | 3.3528e-03 | 3.9511e-06 |
| NF  | SF  | 1 | 5.3962e-03 | 8.4395e-06 |
| NF  | OF  | 1 | 2.8337e-03 | 2.5393e-06 |

|                                 |     |   |            |            |
|---------------------------------|-----|---|------------|------------|
| NF                              | PP  | 1 | 5.6245e-03 | 1.0251e-05 |
| NF                              | FF  | 1 | 1.7903e-03 | 1.8653e-06 |
| NF                              | BB  | 1 | 3.3913e-03 | 5.3791e-06 |
| SF                              | SF  | 1 | 8.5747e-03 | 1.7573e-05 |
| SF                              | OF  | 1 | 4.6198e-03 | 5.5658e-06 |
| SF                              | PP  | 1 | 8.8781e-03 | 2.1062e-05 |
| SF                              | FF  | 1 | 2.8979e-03 | 4.0303e-06 |
| SF                              | BB  | 1 | 5.3855e-03 | 1.1187e-05 |
| OF                              | OF  | 1 | 2.3637e-03 | 1.5898e-06 |
| OF                              | PP  | 1 | 4.8477e-03 | 6.8518e-06 |
| OF                              | FF  | 1 | 1.5043e-03 | 1.1850e-06 |
| OF                              | BB  | 1 | 2.9052e-03 | 3.5519e-06 |
| PP                              | PP  | 1 | 9.1603e-03 | 2.5069e-05 |
| PP                              | FF  | 1 | 3.0295e-03 | 4.9246e-06 |
| PP                              | BB  | 1 | 5.5743e-03 | 1.3399e-05 |
| FF                              | FF  | 1 | 9.5345e-04 | 8.7611e-07 |
| FF                              | BB  | 1 | 1.8217e-03 | 2.5702e-06 |
| BB                              | BB  | 1 | 3.3824e-03 | 7.1206e-06 |
| ;;IL-lipid nonbond interactions |     |   |            |            |
| NA                              | LO  | 1 | 2.8338e-03 | 2.5395e-06 |
| NA                              | LOM | 1 | 2.8338e-03 | 2.5395e-06 |
| NA                              | LNL | 1 | 3.3530e-03 | 3.9513e-06 |
| NA                              | LC  | 1 | 4.1112e-03 | 7.5575e-06 |
| NA                              | LH1 | 1 | 3.7437e-03 | 7.1821e-06 |
| NA                              | LH2 | 1 | 4.9687e-03 | 1.0417e-05 |
| NA                              | LP  | 1 | 5.6240e-03 | 1.0250e-05 |
| NA                              | LOS | 1 | 2.9458e-03 | 2.7435e-06 |
| NA                              | LP2 | 1 | 4.5694e-03 | 1.0030e-05 |
| NA                              | LP3 | 1 | 5.5851e-03 | 1.2259e-05 |
| NA                              | LC3 | 1 | 5.7667e-03 | 1.2658e-05 |
| NA                              | LC2 | 1 | 4.5484e-03 | 8.7259e-06 |
| CR                              | LO  | 1 | 2.3259e-03 | 2.4052e-06 |
| CR                              | LOM | 1 | 2.3259e-03 | 2.4052e-06 |
| CR                              | LNL | 1 | 2.7347e-03 | 3.6954e-06 |
| CR                              | LC  | 1 | 3.3208e-03 | 6.9326e-06 |
| CR                              | LH1 | 1 | 3.0212e-03 | 6.5765e-06 |
| CR                              | LH2 | 1 | 4.0025e-03 | 9.5033e-06 |
| CR                              | LP  | 1 | 4.5436e-03 | 9.4061e-06 |
| CR                              | LOS | 1 | 2.4156e-03 | 2.5937e-06 |
| CR                              | LP2 | 1 | 3.6774e-03 | 9.1333e-06 |
| CR                              | LP3 | 1 | 4.4948e-03 | 1.1163e-05 |
| CR                              | LC3 | 1 | 4.6410e-03 | 1.1526e-05 |
| CR                              | LC2 | 1 | 3.6706e-03 | 7.9901e-06 |
| CW                              | LO  | 1 | 2.3259e-03 | 2.4052e-06 |
| CW                              | LOM | 1 | 2.3259e-03 | 2.4052e-06 |
| CW                              | LNL | 1 | 2.7347e-03 | 3.6954e-06 |
| CW                              | LC  | 1 | 3.3208e-03 | 6.9326e-06 |
| CW                              | LH1 | 1 | 3.0212e-03 | 6.5765e-06 |
| CW                              | LH2 | 1 | 4.0025e-03 | 9.5033e-06 |
| CW                              | LP  | 1 | 4.5436e-03 | 9.4061e-06 |
| CW                              | LOS | 1 | 2.4156e-03 | 2.5937e-06 |
| CW                              | LP2 | 1 | 3.6774e-03 | 9.1333e-06 |

|     |     |   |            |            |
|-----|-----|---|------------|------------|
| CW  | LP3 | 1 | 4.4948e-03 | 1.1163e-05 |
| CW  | LC3 | 1 | 4.6410e-03 | 1.1526e-05 |
| CW  | LC2 | 1 | 3.6706e-03 | 7.9901e-06 |
| H5  | LO  | 1 | 1.1508e-04 | 9.9689e-09 |
| H5  | LOM | 1 | 1.1508e-04 | 9.9689e-09 |
| H5  | LNL | 1 | 1.5447e-04 | 1.9961e-08 |
| H5  | LC  | 1 | 2.2855e-04 | 5.5597e-08 |
| H5  | LH1 | 1 | 2.1169e-04 | 5.4666e-08 |
| H5  | LH2 | 1 | 2.9092e-04 | 8.5007e-08 |
| H5  | LP  | 1 | 3.1157e-04 | 7.4888e-08 |
| H5  | LOS | 1 | 1.2183e-04 | 1.1170e-08 |
| H5  | LP2 | 1 | 2.7234e-04 | 8.4812e-08 |
| H5  | LP3 | 1 | 3.3287e-04 | 1.0366e-07 |
| H5  | LC3 | 1 | 3.4370e-04 | 1.0703e-07 |
| H5  | LC2 | 1 | 2.5719e-04 | 6.6416e-08 |
| H4  | LO  | 1 | 1.8760e-04 | 2.6493e-08 |
| H4  | LOM | 1 | 1.8760e-04 | 2.6493e-08 |
| H4  | LNL | 1 | 2.4428e-04 | 4.9924e-08 |
| H4  | LC  | 1 | 3.4577e-04 | 1.2726e-07 |
| H4  | LH1 | 1 | 3.1900e-04 | 1.2414e-07 |
| H4  | LH2 | 1 | 4.3487e-04 | 1.8994e-07 |
| H4  | LP  | 1 | 4.7176e-04 | 1.7169e-07 |
| H4  | LOS | 1 | 1.9773e-04 | 2.9424e-08 |
| H4  | LP2 | 1 | 4.0542e-04 | 1.8795e-07 |
| H4  | LP3 | 1 | 4.9554e-04 | 2.2973e-07 |
| H4  | LC3 | 1 | 5.1165e-04 | 2.3720e-07 |
| H4  | LC2 | 1 | 3.8757e-04 | 1.5082e-07 |
| CN3 | LO  | 1 | 5.0427e-03 | 7.6062e-06 |
| CN3 | LOM | 1 | 5.0427e-03 | 7.6062e-06 |
| CN3 | LNL | 1 | 5.8351e-03 | 1.1319e-05 |
| CN3 | LC  | 1 | 6.9135e-03 | 2.0215e-05 |
| CN3 | LH1 | 1 | 6.2755e-03 | 1.9090e-05 |
| CN3 | LH2 | 1 | 8.2750e-03 | 2.7329e-05 |
| CN3 | LP  | 1 | 9.4636e-03 | 2.7453e-05 |
| CN3 | LOS | 1 | 5.2252e-03 | 8.1649e-06 |
| CN3 | LP2 | 1 | 7.5846e-03 | 2.6139e-05 |
| CN3 | LP3 | 1 | 9.2705e-03 | 3.1949e-05 |
| CN3 | LC3 | 1 | 9.5719e-03 | 3.2988e-05 |
| CN3 | LC2 | 1 | 7.6244e-03 | 2.3193e-05 |
| CN2 | LO  | 1 | 4.3943e-03 | 6.6812e-06 |
| CN2 | LOM | 1 | 4.3943e-03 | 6.6812e-06 |
| CN2 | LNL | 1 | 5.0831e-03 | 9.9358e-06 |
| CN2 | LC  | 1 | 6.0195e-03 | 1.7727e-05 |
| CN2 | LH1 | 1 | 5.4638e-03 | 1.6739e-05 |
| CN2 | LH2 | 1 | 7.2040e-03 | 2.3958e-05 |
| CN2 | LP  | 1 | 8.2400e-03 | 2.4075e-05 |
| CN2 | LOS | 1 | 4.5531e-03 | 7.1713e-06 |
| CN2 | LP2 | 1 | 6.6026e-03 | 2.2913e-05 |
| CN2 | LP3 | 1 | 8.0702e-03 | 2.8006e-05 |
| CN2 | LC3 | 1 | 8.3326e-03 | 2.8917e-05 |
| CN2 | LC2 | 1 | 6.6382e-03 | 2.0337e-05 |
| CTA | LO  | 1 | 4.7452e-03 | 8.0504e-06 |

|     |     |   |            |            |
|-----|-----|---|------------|------------|
| CTA | LOM | 1 | 4.7452e-03 | 8.0504e-06 |
| CTA | LNL | 1 | 5.4647e-03 | 1.1866e-05 |
| CTA | LC  | 1 | 6.4270e-03 | 2.0881e-05 |
| CTA | LH1 | 1 | 5.8300e-03 | 1.9692e-05 |
| CTA | LH2 | 1 | 7.6766e-03 | 2.8111e-05 |
| CTA | LP  | 1 | 8.7989e-03 | 2.8365e-05 |
| CTA | LOS | 1 | 4.9137e-03 | 8.6300e-06 |
| CTA | LP2 | 1 | 7.0311e-03 | 2.6848e-05 |
| CTA | LP3 | 1 | 8.5939e-03 | 3.2816e-05 |
| CTA | LC3 | 1 | 8.8733e-03 | 3.3883e-05 |
| CTA | LC2 | 1 | 7.0831e-03 | 2.3925e-05 |
| CT2 | LO  | 1 | 4.7452e-03 | 8.0504e-06 |
| CT2 | LOM | 1 | 4.7452e-03 | 8.0504e-06 |
| CT2 | LNL | 1 | 5.4647e-03 | 1.1866e-05 |
| CT2 | LC  | 1 | 6.4270e-03 | 2.0881e-05 |
| CT2 | LH1 | 1 | 5.8300e-03 | 1.9692e-05 |
| CT2 | LH2 | 1 | 7.6766e-03 | 2.8111e-05 |
| CT2 | LP  | 1 | 8.7989e-03 | 2.8365e-05 |
| CT2 | LOS | 1 | 4.9137e-03 | 8.6300e-06 |
| CT2 | LP2 | 1 | 7.0311e-03 | 2.6848e-05 |
| CT2 | LP3 | 1 | 8.5939e-03 | 3.2816e-05 |
| CT2 | LC3 | 1 | 8.8733e-03 | 3.3883e-05 |
| CT2 | LC2 | 1 | 7.0831e-03 | 2.3925e-05 |
| CT3 | LO  | 1 | 5.3813e-03 | 8.7783e-06 |
| CT3 | LOM | 1 | 5.3813e-03 | 8.7783e-06 |
| CT3 | LNL | 1 | 6.2070e-03 | 1.2980e-05 |
| CT3 | LC  | 1 | 7.3180e-03 | 2.2954e-05 |
| CT3 | LH1 | 1 | 6.6397e-03 | 2.1656e-05 |
| CT3 | LH2 | 1 | 8.7469e-03 | 3.0944e-05 |
| CT3 | LP  | 1 | 1.0018e-02 | 3.1178e-05 |
| CT3 | LOS | 1 | 5.5735e-03 | 9.4146e-06 |
| CT3 | LP2 | 1 | 8.0132e-03 | 2.9568e-05 |
| CT3 | LP3 | 1 | 9.7944e-03 | 3.6141e-05 |
| CT3 | LC3 | 1 | 1.0113e-02 | 3.7316e-05 |
| CT3 | LC2 | 1 | 8.0668e-03 | 2.6311e-05 |
| CLA | LO  | 1 | 4.2060e-03 | 5.9555e-06 |
| CLA | LOM | 1 | 4.2060e-03 | 5.9555e-06 |
| CLA | LNL | 1 | 4.8796e-03 | 8.9087e-06 |
| CLA | LC  | 1 | 5.8048e-03 | 1.6040e-05 |
| CLA | LH1 | 1 | 5.2711e-03 | 1.5158e-05 |
| CLA | LH2 | 1 | 6.9559e-03 | 2.1733e-05 |
| CLA | LP  | 1 | 7.9453e-03 | 2.1779e-05 |
| CLA | LOS | 1 | 4.3599e-03 | 6.3977e-06 |
| CLA | LP2 | 1 | 6.3781e-03 | 2.0803e-05 |
| CLA | LP3 | 1 | 7.7958e-03 | 2.5427e-05 |
| CLA | LC3 | 1 | 8.0493e-03 | 2.6254e-05 |
| CLA | LC2 | 1 | 6.4041e-03 | 1.8416e-05 |
| CF3 | LO  | 1 | 8.0775e-03 | 2.1268e-05 |
| CF3 | LOM | 1 | 8.0775e-03 | 2.1268e-05 |
| CF3 | LNL | 1 | 9.1445e-03 | 3.0294e-05 |
| CF3 | LC  | 1 | 1.0473e-02 | 5.0554e-05 |
| CF3 | LH1 | 1 | 9.4765e-03 | 4.7439e-05 |

|     |     |   |            |            |
|-----|-----|---|------------|------------|
| CF3 | LH2 | 1 | 1.2415e-02 | 6.7034e-05 |
| CF3 | LP  | 1 | 1.4345e-02 | 6.8741e-05 |
| CF3 | LOS | 1 | 8.3438e-03 | 2.2688e-05 |
| CF3 | LP2 | 1 | 1.1341e-02 | 6.3688e-05 |
| CF3 | LP3 | 1 | 1.3862e-02 | 7.7845e-05 |
| CF3 | LC3 | 1 | 1.4313e-02 | 8.0376e-05 |
| CF3 | LC2 | 1 | 1.1513e-02 | 5.7635e-05 |
| NF  | LO  | 1 | 2.8338e-03 | 2.5395e-06 |
| NF  | LOM | 1 | 2.8338e-03 | 2.5395e-06 |
| NF  | LNL | 1 | 3.3531e-03 | 3.9513e-06 |
| NF  | LC  | 1 | 4.1113e-03 | 7.5576e-06 |
| NF  | LH1 | 1 | 3.7437e-03 | 7.1822e-06 |
| NF  | LH2 | 1 | 4.9688e-03 | 1.0417e-05 |
| NF  | LP  | 1 | 5.6241e-03 | 1.0250e-05 |
| NF  | LOS | 1 | 2.9458e-03 | 2.7435e-06 |
| NF  | LP2 | 1 | 4.5695e-03 | 1.0030e-05 |
| NF  | LP3 | 1 | 5.5852e-03 | 1.2259e-05 |
| NF  | LC3 | 1 | 5.7668e-03 | 1.2658e-05 |
| NF  | LC2 | 1 | 4.5484e-03 | 8.7260e-06 |
| SF  | LO  | 1 | 4.6201e-03 | 5.5661e-06 |
| SF  | LOM | 1 | 4.6201e-03 | 5.5661e-06 |
| SF  | LNL | 1 | 5.3965e-03 | 8.4401e-06 |
| SF  | LC  | 1 | 6.4872e-03 | 1.5517e-05 |
| SF  | LH1 | 1 | 5.8965e-03 | 1.4692e-05 |
| SF  | LH2 | 1 | 7.7967e-03 | 2.1150e-05 |
| SF  | LP  | 1 | 8.8776e-03 | 2.1061e-05 |
| SF  | LOS | 1 | 4.7938e-03 | 5.9911e-06 |
| SF  | LP2 | 1 | 7.1563e-03 | 2.0286e-05 |
| SF  | LP3 | 1 | 8.7469e-03 | 2.4795e-05 |
| SF  | LC3 | 1 | 9.0314e-03 | 2.5602e-05 |
| SF  | LC2 | 1 | 7.1639e-03 | 1.7851e-05 |
| OF  | LO  | 1 | 2.3639e-03 | 1.5899e-06 |
| OF  | LOM | 1 | 2.3639e-03 | 1.5899e-06 |
| OF  | LNL | 1 | 2.8339e-03 | 2.5395e-06 |
| OF  | LC  | 1 | 3.5448e-03 | 5.0553e-06 |
| OF  | LH1 | 1 | 3.2338e-03 | 4.8219e-06 |
| OF  | LH2 | 1 | 4.3083e-03 | 7.0464e-06 |
| OF  | LP  | 1 | 4.8474e-03 | 6.8514e-06 |
| OF  | LOS | 1 | 2.4619e-03 | 1.7241e-06 |
| OF  | LP2 | 1 | 3.9697e-03 | 6.8111e-06 |
| OF  | LP3 | 1 | 4.8521e-03 | 8.3250e-06 |
| OF  | LC3 | 1 | 5.0099e-03 | 8.5958e-06 |
| OF  | LC2 | 1 | 3.9289e-03 | 5.8584e-06 |
| PP  | LO  | 1 | 4.8480e-03 | 6.8522e-06 |
| PP  | LOM | 1 | 4.8480e-03 | 6.8522e-06 |
| PP  | LNL | 1 | 5.6248e-03 | 1.0252e-05 |
| PP  | LC  | 1 | 6.6921e-03 | 1.8462e-05 |
| PP  | LH1 | 1 | 6.0769e-03 | 1.7447e-05 |
| PP  | LH2 | 1 | 8.0194e-03 | 2.5017e-05 |
| PP  | LP  | 1 | 9.1598e-03 | 2.5068e-05 |
| PP  | LOS | 1 | 5.0254e-03 | 7.3612e-06 |
| PP  | LP2 | 1 | 7.3533e-03 | 2.3947e-05 |

|                                 |     |   |            |            |
|---------------------------------|-----|---|------------|------------|
| PP                              | LP3 | 1 | 8.9878e-03 | 2.9270e-05 |
| PP                              | LC3 | 1 | 9.2801e-03 | 3.0221e-05 |
| PP                              | LC2 | 1 | 7.3831e-03 | 2.1198e-05 |
| FF                              | LO  | 1 | 1.5044e-03 | 1.1851e-06 |
| FF                              | LOM | 1 | 1.5044e-03 | 1.1851e-06 |
| FF                              | LNL | 1 | 1.7904e-03 | 1.8655e-06 |
| FF                              | LC  | 1 | 2.2148e-03 | 3.6319e-06 |
| FF                              | LH1 | 1 | 2.0185e-03 | 3.4572e-06 |
| FF                              | LH2 | 1 | 2.6835e-03 | 5.0310e-06 |
| FF                              | LP  | 1 | 3.0293e-03 | 4.9243e-06 |
| FF                              | LOS | 1 | 1.5651e-03 | 1.2824e-06 |
| FF                              | LP2 | 1 | 2.4699e-03 | 4.8525e-06 |
| FF                              | LP3 | 1 | 3.0189e-03 | 5.9311e-06 |
| FF                              | LC3 | 1 | 3.1171e-03 | 6.1240e-06 |
| FF                              | LC2 | 1 | 2.4523e-03 | 4.2003e-06 |
| BB                              | LO  | 1 | 2.9053e-03 | 3.5521e-06 |
| BB                              | LOM | 1 | 2.9053e-03 | 3.5521e-06 |
| BB                              | LNL | 1 | 3.3915e-03 | 5.3794e-06 |
| BB                              | LC  | 1 | 4.0730e-03 | 9.8709e-06 |
| BB                              | LH1 | 1 | 3.7018e-03 | 9.3448e-06 |
| BB                              | LH2 | 1 | 4.8938e-03 | 1.3447e-05 |
| BB                              | LP  | 1 | 5.5739e-03 | 1.3398e-05 |
| BB                              | LOS | 1 | 3.0143e-03 | 3.8226e-06 |
| BB                              | LP2 | 1 | 4.4915e-03 | 1.2895e-05 |
| BB                              | LP3 | 1 | 5.4898e-03 | 1.5762e-05 |
| BB                              | LC3 | 1 | 5.6683e-03 | 1.6274e-05 |
| BB                              | LC2 | 1 | 4.4975e-03 | 1.1353e-05 |
| ;;IL-water nonbond interactions |     |   |            |            |
| NA                              | OW  | 1 | 2.9649e-03 | 3.2316e-06 |
| NA                              | H   | 1 | 0.0000e+00 | 0.0000e+00 |
| CR                              | OW  | 1 | 2.4224e-03 | 3.0330e-06 |
| CR                              | H   | 1 | 0.0000e+00 | 0.0000e+00 |
| CW                              | OW  | 1 | 2.4224e-03 | 3.0330e-06 |
| CW                              | H   | 1 | 0.0000e+00 | 0.0000e+00 |
| H5                              | OW  | 1 | 1.3188e-04 | 1.5219e-08 |
| H5                              | H   | 1 | 0.0000e+00 | 0.0000e+00 |
| H4                              | OW  | 1 | 2.1031e-04 | 3.8708e-08 |
| H4                              | H   | 1 | 0.0000e+00 | 0.0000e+00 |
| CN3                             | OW  | 1 | 5.1920e-03 | 9.3738e-06 |
| CN3                             | H   | 1 | 0.0000e+00 | 0.0000e+00 |
| CN2                             | OW  | 1 | 4.5234e-03 | 8.2300e-06 |
| CN2                             | H   | 1 | 0.0000e+00 | 0.0000e+00 |
| CTA                             | OW  | 1 | 4.8690e-03 | 9.8532e-06 |
| CTA                             | H   | 1 | 0.0000e+00 | 0.0000e+00 |
| CT2                             | OW  | 1 | 4.8690e-03 | 9.8532e-06 |
| CT2                             | H   | 1 | 0.0000e+00 | 0.0000e+00 |
| CT3                             | OW  | 1 | 5.5280e-03 | 1.0769e-05 |
| CT3                             | H   | 1 | 0.0000e+00 | 0.0000e+00 |
| CLA                             | OW  | 1 | 4.3387e-03 | 7.3670e-06 |
| CLA                             | H   | 1 | 0.0000e+00 | 0.0000e+00 |
| CF3                             | OW  | 1 | 8.1870e-03 | 2.5399e-05 |
| CF3                             | H   | 1 | 0.0000e+00 | 0.0000e+00 |

|    |    |   |            |            |
|----|----|---|------------|------------|
| NF | OW | 1 | 2.9649e-03 | 3.2316e-06 |
| NF | H  | 1 | 0.0000e+00 | 0.0000e+00 |
| SF | OW | 1 | 4.7892e-03 | 6.9530e-06 |
| SF | H  | 1 | 0.0000e+00 | 0.0000e+00 |
| OF | OW | 1 | 2.4967e-03 | 2.0618e-06 |
| OF | H  | 1 | 0.0000e+00 | 0.0000e+00 |
| PP | OW | 1 | 5.0012e-03 | 8.4772e-06 |
| PP | H  | 1 | 0.0000e+00 | 0.0000e+00 |
| FF | OW | 1 | 1.5806e-03 | 1.5207e-06 |
| FF | H  | 1 | 0.0000e+00 | 0.0000e+00 |
| BB | OW | 1 | 3.0103e-03 | 4.4331e-06 |
| BB | H  | 1 | 0.0000e+00 | 0.0000e+00 |

[ pairtypes ]

; IL 1-4 interactions

|    |     |   |            |            |
|----|-----|---|------------|------------|
| NA | NA  | 1 | 1.6764e-03 | 1.9755e-06 |
| NA | CR  | 1 | 1.3672e-03 | 1.8475e-06 |
| NA | CW  | 1 | 1.3672e-03 | 1.8475e-06 |
| NA | H5  | 1 | 7.7226e-05 | 9.9798e-09 |
| NA | H4  | 1 | 1.2213e-04 | 2.4960e-08 |
| NA | CN3 | 1 | 2.9173e-03 | 5.6589e-06 |
| NA | CN2 | 1 | 2.5413e-03 | 4.9675e-06 |
| NA | CTA | 1 | 2.7321e-03 | 5.9324e-06 |
| NA | CT2 | 1 | 2.7321e-03 | 5.9324e-06 |
| NA | CT3 | 1 | 3.1033e-03 | 6.4894e-06 |
| NA | CLA | 1 | 2.4396e-03 | 4.4540e-06 |
| NA | CF3 | 1 | 4.5718e-03 | 1.5146e-05 |
| NA | NF  | 1 | 1.6764e-03 | 1.9755e-06 |
| NA | SF  | 1 | 2.6980e-03 | 4.2197e-06 |
| NA | OF  | 1 | 1.4168e-03 | 1.2697e-06 |
| CR | CR  | 1 | 1.1117e-03 | 1.7174e-06 |
| CR | CW  | 1 | 1.1117e-03 | 1.7174e-06 |
| CR | H5  | 1 | 6.6879e-05 | 1.0523e-08 |
| CR | H4  | 1 | 1.0427e-04 | 2.5579e-08 |
| CR | CN3 | 1 | 2.3538e-03 | 5.1794e-06 |
| CR | CN2 | 1 | 2.0501e-03 | 4.5451e-06 |
| CR | CTA | 1 | 2.1993e-03 | 5.4045e-06 |
| CR | CT2 | 1 | 2.1993e-03 | 5.4045e-06 |
| CR | CT3 | 1 | 2.4999e-03 | 5.9211e-06 |
| CR | CLA | 1 | 1.9709e-03 | 4.0869e-06 |
| CR | CF3 | 1 | 3.6496e-03 | 1.3570e-05 |
| CR | NF  | 1 | 1.3673e-03 | 1.8476e-06 |
| CR | SF  | 1 | 2.1868e-03 | 3.8975e-06 |
| CR | OF  | 1 | 1.1629e-03 | 1.2025e-06 |
| CW | CW  | 1 | 1.1117e-03 | 1.7174e-06 |
| CW | H5  | 1 | 6.6879e-05 | 1.0523e-08 |
| CW | H4  | 1 | 1.0427e-04 | 2.5579e-08 |
| CW | CN3 | 1 | 2.3538e-03 | 5.1794e-06 |
| CW | CN2 | 1 | 2.0501e-03 | 4.5451e-06 |
| CW | CTA | 1 | 2.1993e-03 | 5.4045e-06 |
| CW | CT2 | 1 | 2.1993e-03 | 5.4045e-06 |
| CW | CT3 | 1 | 2.4999e-03 | 5.9211e-06 |

|     |     |   |            |            |
|-----|-----|---|------------|------------|
| CW  | CLA | 1 | 1.9709e-03 | 4.0869e-06 |
| CW  | CF3 | 1 | 3.6496e-03 | 1.3570e-05 |
| CW  | NF  | 1 | 1.3673e-03 | 1.8476e-06 |
| CW  | SF  | 1 | 2.1868e-03 | 3.8975e-06 |
| CW  | OF  | 1 | 1.1629e-03 | 1.2025e-06 |
| H5  | H5  | 1 | 9.4393e-07 | 3.5493e-12 |
| H5  | H4  | 1 | 2.1064e-06 | 1.7675e-11 |
| H5  | CN3 | 1 | 1.6568e-04 | 4.3452e-08 |
| H5  | CN2 | 1 | 1.4477e-04 | 3.8374e-08 |
| H5  | CTA | 1 | 1.6216e-04 | 4.9748e-08 |
| H5  | CT2 | 1 | 1.6216e-04 | 4.9748e-08 |
| H5  | CT3 | 1 | 1.8152e-04 | 5.2855e-08 |
| H5  | CLA | 1 | 1.3525e-04 | 3.2586e-08 |
| H5  | CF3 | 1 | 3.1693e-04 | 1.7326e-07 |
| H5  | NF  | 1 | 7.7227e-05 | 9.9799e-09 |
| H5  | SF  | 1 | 1.4041e-04 | 2.7203e-08 |
| H5  | OF  | 1 | 5.7536e-05 | 4.9842e-09 |
| H4  | H4  | 1 | 4.2753e-06 | 7.2811e-11 |
| H4  | CN3 | 1 | 2.4942e-04 | 9.8470e-08 |
| H4  | CN2 | 1 | 2.1778e-04 | 8.6841e-08 |
| H4  | CTA | 1 | 2.4163e-04 | 1.1046e-07 |
| H4  | CT2 | 1 | 2.4163e-04 | 1.1046e-07 |
| H4  | CT3 | 1 | 2.7140e-04 | 1.1815e-07 |
| H4  | CLA | 1 | 2.0475e-04 | 7.4682e-08 |
| H4  | CF3 | 1 | 4.5578e-04 | 3.5833e-07 |
| H4  | NF  | 1 | 1.2213e-04 | 2.4960e-08 |
| H4  | SF  | 1 | 2.1573e-04 | 6.4219e-08 |
| H4  | OF  | 1 | 9.3794e-05 | 1.3246e-08 |
| CN3 | CN3 | 1 | 4.8863e-03 | 1.5017e-05 |
| CN3 | CN2 | 1 | 4.2542e-03 | 1.3167e-05 |
| CN3 | CTA | 1 | 4.5385e-03 | 1.5485e-05 |
| CN3 | CT2 | 1 | 4.5385e-03 | 1.5485e-05 |
| CN3 | CT3 | 1 | 5.1692e-03 | 1.7032e-05 |
| CN3 | CLA | 1 | 4.1046e-03 | 1.1926e-05 |
| CN3 | CF3 | 1 | 7.3726e-03 | 3.7256e-05 |
| CN3 | NF  | 1 | 2.9173e-03 | 5.6590e-06 |
| CN3 | SF  | 1 | 4.5927e-03 | 1.1566e-05 |
| CN3 | OF  | 1 | 2.5212e-03 | 3.8029e-06 |
| CN2 | CN2 | 1 | 3.7039e-03 | 1.1545e-05 |
| CN2 | CTA | 1 | 3.9510e-03 | 1.3574e-05 |
| CN2 | CT2 | 1 | 3.9510e-03 | 1.3574e-05 |
| CN2 | CT3 | 1 | 4.5001e-03 | 1.4931e-05 |
| CN2 | CLA | 1 | 3.5739e-03 | 1.0459e-05 |
| CN2 | CF3 | 1 | 6.4153e-03 | 3.2630e-05 |
| CN2 | NF  | 1 | 2.5414e-03 | 4.9676e-06 |
| CN2 | SF  | 1 | 3.9996e-03 | 1.0146e-05 |
| CN2 | OF  | 1 | 2.1970e-03 | 3.3404e-06 |
| CTA | CTA | 1 | 4.2080e-03 | 1.5910e-05 |
| CTA | CT2 | 1 | 4.2080e-03 | 1.5910e-05 |
| CTA | CT3 | 1 | 4.7956e-03 | 1.7520e-05 |
| CTA | CLA | 1 | 3.8162e-03 | 1.2322e-05 |
| CTA | CF3 | 1 | 6.7917e-03 | 3.7789e-05 |

|     |     |   |            |            |
|-----|-----|---|------------|------------|
| CTA | NF  | 1 | 2.7322e-03 | 5.9325e-06 |
| CTA | SF  | 1 | 4.2808e-03 | 1.2010e-05 |
| CTA | OF  | 1 | 2.3725e-03 | 4.0250e-06 |
| CT2 | CT2 | 1 | 4.2080e-03 | 1.5910e-05 |
| CT2 | CT3 | 1 | 4.7956e-03 | 1.7520e-05 |
| CT2 | CLA | 1 | 3.8162e-03 | 1.2322e-05 |
| CT2 | CF3 | 1 | 6.7917e-03 | 3.7789e-05 |
| CT2 | NF  | 1 | 2.7322e-03 | 5.9325e-06 |
| CT2 | SF  | 1 | 4.2808e-03 | 1.2010e-05 |
| CT2 | OF  | 1 | 2.3725e-03 | 4.0250e-06 |
| CT3 | CT3 | 1 | 5.4641e-03 | 1.9286e-05 |
| CT3 | CLA | 1 | 4.3451e-03 | 1.3544e-05 |
| CT3 | CF3 | 1 | 7.7566e-03 | 4.1792e-05 |
| CT3 | NF  | 1 | 3.1033e-03 | 6.4895e-06 |
| CT3 | SF  | 1 | 4.8700e-03 | 1.3179e-05 |
| CT3 | OF  | 1 | 2.6905e-03 | 4.3889e-06 |
| CLA | CLA | 1 | 3.4462e-03 | 9.4615e-06 |
| CLA | CF3 | 1 | 6.2210e-03 | 2.9855e-05 |
| CLA | NF  | 1 | 2.4396e-03 | 4.4540e-06 |
| CLA | SF  | 1 | 3.8507e-03 | 9.1503e-06 |
| CLA | OF  | 1 | 2.1029e-03 | 2.9776e-06 |
| CF3 | CF3 | 1 | 1.0708e-02 | 8.5652e-05 |
| CF3 | NF  | 1 | 4.5719e-03 | 1.5146e-05 |
| CF3 | SF  | 1 | 7.0420e-03 | 2.9632e-05 |
| CF3 | OF  | 1 | 4.0385e-03 | 1.0634e-05 |
| NF  | NF  | 1 | 1.6764e-03 | 1.9755e-06 |
| NF  | SF  | 1 | 2.6981e-03 | 4.2198e-06 |
| NF  | OF  | 1 | 1.4168e-03 | 1.2697e-06 |
| SF  | SF  | 1 | 4.2873e-03 | 8.7865e-06 |
| SF  | OF  | 1 | 2.3099e-03 | 2.7829e-06 |
| OF  | OF  | 1 | 1.1819e-03 | 7.9492e-07 |

; Lipid 1-4 interactions, note that these interactions are half of what's given in  
;the original lipid force field because the pairs are listed twice in the lipid itp  
;to account for the fact that the electrostatic scaling is 0.5 for the IL and 1.0  
;for lipids

|     |     |   |             |             |
|-----|-----|---|-------------|-------------|
| LO  | LO  | 1 | 1.47600E-04 | 9.93500E-08 |
| LO  | LOM | 1 | 1.47600E-04 | 9.93500E-08 |
| LO  | OW  | 1 | 1.56400E-04 | 1.29200E-07 |
| LO  | LNL | 1 | 1.75900E-04 | 1.56650E-07 |
| LO  | LC  | 1 | 2.12300E-04 | 2.90450E-07 |
| LO  | LH1 | 1 | 1.92750E-04 | 2.74500E-07 |
| LO  | LH2 | 1 | 2.54100E-04 | 3.92600E-07 |
| LO  | H   | 1 | 0.00000E+00 | 0.00000E+00 |
| LO  | LP  | 1 | 2.90650E-04 | 3.94500E-07 |
| LO  | LOS | 1 | 1.53750E-04 | 1.07650E-07 |
| LO  | LP2 | 1 | 2.32850E-04 | 3.75000E-07 |
| LO  | LP3 | 1 | 2.84500E-04 | 4.58400E-07 |
| LO  | LC3 | 1 | 2.93800E-04 | 4.73300E-07 |
| LO  | LC2 | 1 | 2.34250E-04 | 3.33400E-07 |
| LOM | LOM | 1 | 1.47600E-04 | 9.93500E-08 |
| LOM | OW  | 1 | 1.56400E-04 | 1.29200E-07 |
| LOM | LNL | 1 | 1.75900E-04 | 1.56650E-07 |

|     |     |   |             |             |
|-----|-----|---|-------------|-------------|
| LOM | LC  | 1 | 2.12300E-04 | 2.90450E-07 |
| LOM | LH1 | 1 | 1.92750E-04 | 2.74500E-07 |
| LOM | LH2 | 1 | 2.54100E-04 | 3.92600E-07 |
| LOM | H   | 1 | 0.00000E+00 | 0.00000E+00 |
| LOM | LP  | 1 | 2.90650E-04 | 3.94500E-07 |
| LOM | LOS | 1 | 1.53750E-04 | 1.07650E-07 |
| LOM | LP2 | 1 | 2.32850E-04 | 3.75000E-07 |
| LOM | LP3 | 1 | 2.84500E-04 | 4.58400E-07 |
| LOM | LC3 | 1 | 2.93800E-04 | 4.73300E-07 |
| LOM | LC2 | 1 | 2.34250E-04 | 3.33400E-07 |
| OW  | LNL | 1 | 1.86350E-04 | 2.03700E-07 |
| OW  | LC  | 1 | 2.24900E-04 | 3.77800E-07 |
| OW  | LH1 | 1 | 2.04250E-04 | 3.57050E-07 |
| OW  | LH2 | 1 | 2.69250E-04 | 5.10500E-07 |
| OW  | H   | 1 | 0.00000E+00 | 0.00000E+00 |
| OW  | LP  | 1 | 3.07950E-04 | 5.13000E-07 |
| OW  | LOS | 1 | 1.62900E-04 | 1.40050E-07 |
| OW  | LP2 | 1 | 2.46700E-04 | 4.87700E-07 |
| OW  | LP3 | 1 | 3.01450E-04 | 5.96000E-07 |
| OW  | LC3 | 1 | 3.11300E-04 | 6.15500E-07 |
| OW  | LC2 | 1 | 2.48200E-04 | 4.33650E-07 |
| LNL | LNL | 1 | 2.09600E-04 | 2.47000E-07 |
| LNL | LC  | 1 | 2.52950E-04 | 4.58050E-07 |
| LNL | LH1 | 1 | 2.29700E-04 | 4.32850E-07 |
| LNL | LH2 | 1 | 3.02800E-04 | 6.19000E-07 |
| LNL | H   | 1 | 0.00000E+00 | 0.00000E+00 |
| LNL | LP  | 1 | 3.46350E-04 | 6.22000E-07 |
| LNL | LOS | 1 | 1.83250E-04 | 1.69800E-07 |
| LNL | LP2 | 1 | 2.77450E-04 | 5.91500E-07 |
| LNL | LP3 | 1 | 3.39050E-04 | 7.23000E-07 |
| LNL | LC3 | 1 | 3.50150E-04 | 7.46500E-07 |
| LNL | LC2 | 1 | 2.79150E-04 | 5.25500E-07 |
| LC  | LC  | 1 | 3.05300E-04 | 8.49500E-07 |
| LC  | LH1 | 1 | 2.77250E-04 | 8.02500E-07 |
| LC  | LH2 | 1 | 3.65400E-04 | 1.14800E-06 |
| LC  | H   | 1 | 0.00000E+00 | 0.00000E+00 |
| LC  | LP  | 1 | 4.18000E-04 | 1.15350E-06 |
| LC  | LOS | 1 | 2.21100E-04 | 3.14850E-07 |
| LC  | LP2 | 1 | 3.34850E-04 | 1.09650E-06 |
| LC  | LP3 | 1 | 4.09150E-04 | 1.34050E-06 |
| LC  | LC3 | 1 | 4.22550E-04 | 1.38400E-06 |
| LC  | LC2 | 1 | 3.36850E-04 | 9.75000E-07 |
| LH1 | LH1 | 1 | 2.51750E-04 | 7.58500E-07 |
| LH1 | LH2 | 1 | 3.31850E-04 | 1.08500E-06 |
| LH1 | H   | 1 | 0.00000E+00 | 0.00000E+00 |
| LH1 | LP  | 1 | 3.79600E-04 | 1.09000E-06 |
| LH1 | LOS | 1 | 2.00800E-04 | 2.97550E-07 |
| LH1 | LP2 | 1 | 3.04100E-04 | 1.03650E-06 |
| LH1 | LP3 | 1 | 3.71550E-04 | 1.26700E-06 |
| LH1 | LC3 | 1 | 3.83700E-04 | 1.30800E-06 |
| LH1 | LC2 | 1 | 3.05900E-04 | 9.21500E-07 |
| LH2 | LH2 | 1 | 4.37400E-04 | 1.55200E-06 |

|     |     |   |             |             |
|-----|-----|---|-------------|-------------|
| LH2 | H   | 1 | 0.00000E+00 | 0.00000E+00 |
| LH2 | LP  | 1 | 5.00500E-04 | 1.55950E-06 |
| LH2 | LOS | 1 | 2.64700E-04 | 4.25600E-07 |
| LH2 | LP2 | 1 | 4.00800E-04 | 1.48200E-06 |
| LH2 | LP3 | 1 | 4.89750E-04 | 1.81200E-06 |
| LH2 | LC3 | 1 | 5.06000E-04 | 1.87100E-06 |
| LH2 | LC2 | 1 | 4.03250E-04 | 1.31800E-06 |
| H   | H   | 1 | 0.00000E+00 | 0.00000E+00 |
| H   | LP  | 1 | 0.00000E+00 | 0.00000E+00 |
| H   | LOS | 1 | 0.00000E+00 | 0.00000E+00 |
| H   | LP2 | 1 | 0.00000E+00 | 0.00000E+00 |
| H   | LP3 | 1 | 0.00000E+00 | 0.00000E+00 |
| H   | LC3 | 1 | 0.00000E+00 | 0.00000E+00 |
| H   | LC2 | 1 | 0.00000E+00 | 0.00000E+00 |
| LP  | LP  | 1 | 5.72500E-04 | 1.56650E-06 |
| LP  | LOS | 1 | 3.02750E-04 | 4.27600E-07 |
| LP  | LP2 | 1 | 4.58450E-04 | 1.48900E-06 |
| LP  | LP3 | 1 | 5.60000E-04 | 1.82050E-06 |
| LP  | LC3 | 1 | 5.78500E-04 | 1.88000E-06 |
| LP  | LC2 | 1 | 4.61250E-04 | 1.32400E-06 |
| LOS | LOS | 1 | 1.60150E-04 | 1.16700E-07 |
| LOS | LP2 | 1 | 2.42550E-04 | 4.06450E-07 |
| LOS | LP3 | 1 | 2.96350E-04 | 4.96900E-07 |
| LOS | LC3 | 1 | 3.06050E-04 | 5.13000E-07 |
| LOS | LC2 | 1 | 2.44000E-04 | 3.61400E-07 |
| LP2 | LP2 | 1 | 3.67300E-04 | 1.41550E-06 |
| LP2 | LP3 | 1 | 4.48750E-04 | 1.73050E-06 |
| LP2 | LC3 | 1 | 4.63450E-04 | 1.78700E-06 |
| LP2 | LC2 | 1 | 3.69500E-04 | 1.25850E-06 |
| LP3 | LP3 | 1 | 5.48500E-04 | 2.11550E-06 |
| LP3 | LC3 | 1 | 5.66500E-04 | 2.18450E-06 |
| LP3 | LC2 | 1 | 4.51500E-04 | 1.53850E-06 |
| LC3 | LC3 | 1 | 5.85000E-04 | 2.25550E-06 |
| LC3 | LC2 | 1 | 4.66250E-04 | 1.58850E-06 |
| LC2 | LC2 | 1 | 3.71750E-04 | 1.11900E-06 |

## MD Parameters

example\_npt.mdp

```
integrator      = md
dt             = 0.002
nsteps        = 5000000

; Parameters controlling output writing
nstxout       = 5000
nstvout       = 5000
nstenergy     = 5000
nstlog        = 5000

ns_type       = grid
nstlist       = 5
rlist         = 1.2
rcoulomb      = 1.2
rvdw          = 1.2
pbc           = xyz

; Parameters for treating bonded interactions
continuation  = yes
constraint_algorithm = LINCS
constraints   = all-bonds
lincs_iter   = 1
lincs_order  = 4

coulombtype   = PME
pme_order     = 4

; Temperature coupling parameters
tcoupl       = Nose-Hoover
tc-grps      = POP          BMI_CLA_SOL
tau_t        = 0.5          0.5
ref_t        = 298          298

; Pressure coupling parameters
pcoupl       = Parrinello-Rahman
pcoupltype   = semiisotropic
tau_p        = 5.0
ref_p        = 1.0          1.0
compressibility = 4.5e-5      4.5e-5
DispCorr     = no
gen_vel      = no
nstcomm      = 1
comm_mode    = Linear
comm_grps    = POP BMI CLA SOL
```

example\_pull.mdp

```
title           = pulling simulation

integrator      = md
dt              = 0.002
tinit          = 0
nsteps         = 250000
nstcomm        = 10

nstxout        = 5000
nstvout        = 5000
nstfout        = 500
nstxtcout      = 500
nstenergy      = 500

constraint_algorithm = lincs
constraints       = all-bonds
continuation      = no

nstlist        = 5
ns_type        = grid
rlist          = 1.2
rcoulomb       = 1.2
rvdw           = 1.2

coulombtype    = PME
fourierspacing = 0.16
fourier_nx     = 0
fourier_ny     = 0
fourier_nz     = 0
pme_order      = 4
ewald_rtol     = 1e-5
optimize_fft   = yes

Tcoupl         = Nose-Hoover
tc_grps        = POP    BMI_CLA_SOL
tau_t          = 0.5    0.5
ref_t          = 298    298

Pcoupl         = Parrinello-Rahman
pcoupltype     = semiisotropic
tau_p          = 5.0
compressibility = 4.5e-5 4.5e-5
ref_p          = 1.0 1.0
refcoord_scaling = com
gen_vel        = no
pbc            = xyz
DispCorr       = no

pull           = umbrella
pull_geometry  = distance
```

```
pull_dim      = N N Y
pull_start    = yes
pull_ngroups  = 1
pull_group0   = POP
pull_group1   = CLA
pull_rate1    = -0.01
pull_k1       = 1000
comm_mode     = Linear
comm_grps     = POP BMI CLA SOL
```

#### example\_umbrella.mdp

```
title         = Umbrella simulation

integrator    = md
dt            = 0.002
tinit        = 0
nsteps       = 5000000
nstcomm      = 1

nstxout      = 5000
nstvout      = 5000
nstfout      = 5000
nstxtcout   = 5000
nstenergy    = 5000

constraint_algorithm = lincs
constraints      = all-bonds
continuation     = yes
nstlist         = 5
ns_type         = grid
rlist           = 1.2
rcoulomb        = 1.2
rvdw            = 1.2
coulombtype     = PME
fourierspacing  = 0.16
fourier_nx      = 0
fourier_ny      = 0
fourier_nz      = 0
pme_order       = 4
ewald_rtol      = 1e-5
optimize_fft    = yes

Tcoupl         = Nose-Hoover
tc_grps        = POP   BMI_CLA_SOL
tau_t          = 0.5   0.5
ref_t          = 298   298

Pcoupl         = Parrinello-Rahman
pcoupltype     = semiisotropic
tau_p          = 5.0 5.0
```

```
compressibility = 4.5e-5 4.5e-5
ref_p           = 1.0 1.0

refcoord_scaling = com
gen_vel        = no
pbc           = xyz
DispCorr      = no

pull           = umbrella
pull_geometry  = distance
pull_dim       = N N Y
pull_start     = yes
pull_ngroups   = 1
pull_group0    = POP
pull_group1    = CLA
pull_init1     = 0
pull_rate1     = 0.0
pull_k1        = 1000
pull_nstxout   = 100
pull_nstfout   = 100
comm_mode      = Linear
comm_grps      = POP BMI CLA SOL
```
